1 **Cell type-specific *cis*-regulatory divergence in gene expression and chromatin accessibility revealed by**  
2 **human-chimpanzee hybrid cells**

3

4 Ban Wang<sup>1,\*</sup>, Alexander L. Starr<sup>1,\*</sup>, Hunter B. Fraser<sup>1,2</sup>

5

6 \*Indicates equal contribution

7 1. Department of Biology, Stanford University, Stanford, CA, USA

8 2. Correspondence: [hbfraser@stanford.edu](mailto:h Fraser@stanford.edu)

9

10

11 **Abstract:**

12 Although gene expression divergence has long been postulated to be the primary driver of human  
13 evolution, identifying the genes and genetic variants underlying uniquely human traits has proven to be  
14 quite challenging. Theory suggests that cell type-specific *cis*-regulatory variants may fuel evolutionary  
15 adaptation due to the specificity of their effects. These variants can precisely tune the expression of a  
16 single gene in a single cell type, avoiding the potentially deleterious consequences of *trans*-acting  
17 changes and non-cell type-specific changes that can impact many genes and cell types, respectively. It  
18 has recently become possible to quantify human-specific *cis*-acting regulatory divergence by measuring  
19 allele-specific expression in human-chimpanzee hybrid cells—the product of fusing induced pluripotent  
20 stem (iPS) cells of each species *in vitro*. However, these *cis*-regulatory changes have only been explored  
21 in a limited number of tissues and cell types. Here, we quantify human-chimpanzee *cis*-regulatory  
22 divergence in gene expression and chromatin accessibility across six cell types, enabling the  
23 identification of highly cell type-specific *cis*-regulatory changes. We find that cell type-specific genes and  
24 regulatory elements evolve faster than those shared across cell types, suggesting an important role for

25 genes with cell type-specific expression in human evolution. Furthermore, we identify several instances  
26 of lineage-specific natural selection that may have played key roles in specific cell types, such as  
27 coordinated changes in the *cis*-regulation of dozens of genes involved in neuronal firing in motor  
28 neurons. Finally, using novel metrics and a machine learning model, we identify genetic variants that  
29 likely alter chromatin accessibility and transcription factor binding, leading to neuron-specific changes in  
30 the expression of the neurodevelopmentally important genes *FABP7* and *GAD1*. Overall, our results  
31 demonstrate that integrative analysis of *cis*-regulatory divergence in chromatin accessibility and gene  
32 expression across cell types is a promising approach to identify the specific genes and genetic variants  
33 that make us human.

34

### 35 **Introduction:**

36 In the past few million years, humans have evolved a multitude of unique phenotypes (Shave et al.,  
37 2019; Vanderhaeghen & Polleux, 2023). For example, our cardiovascular system has evolved to enable  
38 extended periods of physical exertion and the unique aspects of our nervous system enable human  
39 language and toolmaking (Shave et al., 2019; Vanderhaeghen & Polleux, 2023). Previous research  
40 suggests that much of human adaptation may be caused by changes in gene expression (Fraser, 2013;  
41 King & Wilson, 1975; Reilly & Noonan, 2016; Romero et al., 2012). To catalog these changes, studies  
42 have compared gene expression in post-mortem tissues of humans and our closest living relatives,  
43 chimpanzees (Blake et al., 2020; Kelley & Gilad, 2020; Ma et al., 2022). Although thousands of  
44 differentially expressed genes have been identified in post-mortem samples, it is generally not possible  
45 to determine whether genetic differences cause a gene to be differentially expressed. In post-mortem  
46 studies, genetic differences cannot be disentangled from sources of variation such as differences in diet,  
47 environment, cell type abundances, age, post-mortem interval, and other confounding factors. In  
48 addition, for many traits the relevant gene expression differences may be specific to early development,

49 but it is impossible to study fetal development *in vivo* in non-human great apes due to both ethical and  
50 technical difficulties. To circumvent these issues, several groups have used great ape iPS cells to study  
51 differences in gene expression in cell types present in early development (Benito-Kwiecinski et al., 2021;  
52 Field et al., 2019; Kanton et al., 2019; Pavlovic et al., 2018). While the use of iPS cells addresses many of  
53 the confounding factors present in post-mortem comparisons, they also introduce new issues such as  
54 interspecies differences in iPS cell differentiation kinetics, efficiency, and maturation. Overall, it remains  
55 tremendously challenging to identify human-specific changes in gene expression, which limits our ability  
56 to link expression differences to either phenotypic differences or natural selection on the human  
57 lineage.

58  
59 One particularly powerful means of studying the evolution of gene expression is through the  
60 measurement of allele specific expression (ASE) in hybrids between two species (Combs et al., 2018;  
61 Fraser, 2011; Hu et al., 2022; Mack & Nachman, 2017; Wittkopp et al., 2004). This approach has the  
62 advantage of eliminating many confounding factors inherent to interspecies comparisons, including  
63 differences in cell type composition, environmental factors, developmental stage, and response to  
64 differentiation protocols. Because the trans-acting environments of the two alleles in a hybrid are  
65 identical, ASE has the additional benefit of reflecting only *cis*-regulatory changes, which are thought to  
66 be less pleiotropic and more likely to drive evolutionary adaptation than broader *trans*-acting changes  
67 (Agolia et al., 2021; Gokhman et al., 2021; Prud'homme et al., 2007; Wittkopp & Kalay, 2012).  
68 Furthermore, ASE enables the use of powerful methods that can detect lineage-specific natural selection  
69 and, as a result, contribute to our understanding of the selective pressures that have shaped the  
70 evolution of a wide variety of species (Fraser, 2011). Until recently, it has not been possible to  
71 disentangle *cis*- and *trans*-acting changes fixed in the human lineage since humans cannot hybridize with  
72 any other species. However, the development of human-chimpanzee hybrid iPS cells enables

73 measurement of ASE in a wide variety of tissues and developmental contexts (Agoglia et al., 2021;  
74 Gokhman et al., 2021; Song et al., 2021). This provides an effective platform to investigate general  
75 principles of hominid gene expression evolution, detect lineage-specific selection, and identify candidate  
76 gene expression changes underlying human-specific traits.

77

78 While gene expression differences between humans and chimpanzees are well-studied, there has been  
79 less focus on epigenetic changes, many of which are likely to underlie differences in gene expression  
80 (García-Pérez et al., 2021; Kozlenkov et al., 2020; Netherlands Brain Bank et al., 2016; Trizzino et al.,  
81 2017). Furthermore, these studies, regardless of whether they utilize post-mortem tissues or cell lines,  
82 are subject to the same confounding factors mentioned above. Analogous to ASE, one can use the assay  
83 for transposase accessible chromatin using sequencing (ATAC-seq) in interspecies hybrids to measure  
84 allele-specific chromatin accessibility (ASCA) (Buenrostro et al., 2013; Corces et al., 2017; Liang et al.,  
85 2021; S. Zhang et al., 2020). As with ASE, ASCA is unaffected by many confounders inherent to between-  
86 species comparisons and only measures *cis*-regulatory divergence. Perhaps most importantly, ASCA can  
87 implicate specific regulatory elements that likely underlie gene expression differences. These regulatory  
88 elements can then be more closely studied to identify the likely causal genetic variants and the  
89 molecular mechanisms by which those variants alter gene expression.

90

91 Here, we generated RNA-seq and ATAC-seq data from six human-chimpanzee hybrid iPS cell-derived cell  
92 types and quantified ASE and ASCA. Using this dataset, we identified thousands of genes and *cis*-  
93 regulatory elements showing cell type-specific ASE and ASCA. We found that cell type-specific genes and  
94 *cis*-regulatory elements are more likely to have divergent expression and accessibility than their more  
95 broadly expressed/accessible counterparts. Furthermore, we provide evidence for polygenic selection  
96 on the expression level of genes associated with physiologically relevant gene sets including sodium

97 channels and syntaxin-binding proteins in motor neurons. Finally, we use newly developed metrics and  
98 machine learning algorithms to link cell type-specific differences in chromatin accessibility and gene  
99 expression and identify putative causal mutations underlying these differences. Using this pipeline we  
100 identified motor neuron-specific increases in promoter chromatin accessibility and gene expression for  
101 *FABP7*, which plays a key role in neurodevelopment but is not well-studied in neurons. In addition, we  
102 focus on a human-accelerated region (HAR) near the promoter of *GAD1*. While this region is accessible  
103 in all cell types, both the accessibility of the HAR and the expression of *GAD1* are only chimpanzee-  
104 biased in motor neurons. Analysis of scRNA-seq from human and chimpanzee brain organoids showed  
105 that increased expression of *GAD1* also occurs in ventral forebrain inhibitory neurons. Overall, this study  
106 provides insight into the evolution of gene expression in great apes as well as a resource that will inform  
107 functional dissection of human-specific molecular changes.

108

## 109 **Results**

110

### 111 **Cis-regulatory divergence of gene expression in six cell types is largely cell type-specific or shared** 112 **across all cell types**

113

114 To measure genome-wide cis-regulatory divergence in gene expression, we performed RNA-seq on six  
115 cell types derived from human-chimpanzee hybrid iPS cells (Fig. 1a). The cell types profiled were from six  
116 diverse developmental lineages including the motor neuron (MN), cardiomyocyte (CM), hepatocyte  
117 progenitor (HP), pancreatic progenitor (PP), skeletal myocyte (SKM), and retinal pigment epithelium  
118 (RPE) lineages. These represent all three germ layers and a variety of organs (Fig. 1a). It is worth noting  
119 that these differentiations do not necessarily lead to a pure population of cells, but rather a population  
120 of cells with different levels of maturity along a particular developmental lineage. For example, the SKM

121 population likely contains fully differentiated muscle fibers as well as a small population of proliferating  
122 satellite cells; for clarity we refer to this as the SKM cell type. As these different cell types are not shared  
123 between tissues, we use cell type-specific and tissue-specific interchangeably throughout the  
124 manuscript.

125  
126 Two independently generated hybrid lines were differentiated for each cell type and at least two  
127 biological replicates per hybrid line per cell type were collected (see Methods). Each cell type was  
128 sequenced to an average depth of 134 million paired-end reads (Supp Fig. 1). We used a computational  
129 pipeline to quantify ASE adapted from the pipeline introduced by Agoglia et al (Agoglia et al., 2021).  
130 Briefly, we computed ASE by mapping reads to both the human and chimpanzee genomes, correcting  
131 for mapping bias, and assigning reads to the human or chimpanzee genome if a read contained one or  
132 more human-chimpanzee single nucleotide differences (see Methods).

133  
134 As expected, the samples clustered predominantly by cell type (Fig. 1b-c). Within four of the six cell type  
135 clusters, individual samples clustered by line rather than species of origin, potentially indicating line to  
136 line variability in differentiation (Fig. 1b). This highlights the importance of measuring ASE which, by  
137 definition, is measured within each line and so robust to variability between lines. Indeed, when  
138 performing PCA within cell types using allelic counts (i.e. counting reads from the human allele and  
139 chimpanzee allele separately), human and chimpanzee species differences were clearly separated by  
140 principal component (PC) 1 or PC2 in each cell type (Fig. 1d, Supp Fig. 2). To assess the success of our  
141 differentiations, we examined each cell type for the expression of known marker genes in our RNA-seq  
142 data (Fig. 1e, Supp Fig. 3). All cell types express canonical marker genes and do not express pluripotency  
143 markers, indicating that the differentiations were successful (Fig. 1e, Supp Fig 3, Additional file 1)

144 (BurrIDGE et al., 2014; Chal et al., 2016; Korytnikov & Nostro, 2016; Mallanna & Duncan, 2013; Maury et  
145 al., 2015; Sharma et al., 2019).

146  
147 Because our hybrid cells were grown concurrently with their human and chimpanzee diploid “parental”  
148 cells, we performed an additional check for purity of the hybrid lines by quantifying genome-wide ASE.  
149 We noticed that among our 25 RNA-seq samples, the two PP hybrid2 samples had a slight bias towards  
150 higher expression from the chimpanzee alleles across all chromosomes. This is likely due to a small  
151 fraction of contaminating chimpanzee cells in these samples. We corrected for this by reducing the  
152 chimpanzee allele counts such that the number of reads assigned to the human and chimpanzee alleles  
153 was equal. By simulating contamination of a hybrid sample with chimpanzee cells, we found that this  
154 correction was conservative and that the log fold-change estimates were largely unaffected by  
155 contamination after this correction (Methods, Supp Fig. 4).

156  
157 We next investigated which genes were differentially expressed between the human and chimpanzee  
158 allele in each cell type (Fig. 2a). We identified thousands of genes showing significantly biased ASE in  
159 each cell type at a false discovery rate (FDR) cutoff of 0.05 (Fig. 2b). We detected a comparable number  
160 of ASE genes in all cell types except SKM. As a result, we repeated all subsequent analyses both including  
161 and excluding SKM and obtained qualitatively similar results regardless of whether SKM was included.

162  
163 While a considerable number of genes had significant ASE in all cell types, many more genes only had  
164 significant ASE in a single cell type, suggesting cell type-specific *cis*-regulatory divergence (Fig. 2b). A  
165 notable family of developmentally important genes that exemplifies differences in ASE across cell types  
166 is the neurotrophins and their receptors (Fig. 2c) (Caporali & Emanuelli, 2009; Huang & Reichardt, 2001).  
167 For example, *NTRK3*, which plays a key role in the development of the nervous system, is only

168 differentially expressed in RPE and MN but is chimpanzee-biased in RPE and human-biased in MN (Supp  
169 Fig. 5) (Ichim et al., 2012; Naito et al., 2017). In addition, the gene coding for its primary ligand (*NTF3*) is  
170 differentially expressed in a variety of cell types yet is human-biased in all cell types except MN in which  
171 it is chimpanzee-biased (Supp Fig. 5). *NTRK1* differential expression is similarly tissue-specific as it is  
172 strongly chimpanzee-biased in MN, but human-biased in CM and SKM (Supp Fig. 5). These results  
173 indicate that the regulatory landscape of these genes has undergone many complex *cis*-regulatory  
174 changes as the human and chimpanzee lineages have diverged.

175  
176 To further investigate the relationship between tissue-specificity and ASE, we asked whether genes with  
177 variable expression across tissues are more likely to show ASE. Using a standard definition of cell type-  
178 specific genes—those with detectable expression in only one cell type in our study—we found that cell  
179 type-specific genes were typically enriched for ASE in the one cell type where they are expressed (Supp  
180 Fig. 6) (GTEx Consortium, 2017; Jain & Tuteja, 2019). However, other cell type-specific expression  
181 patterns such as uniquely low expression in a particular cell type may also indicate an important dosage-  
182 sensitive function in that cell type. We therefore focused on a broader definition of cell type-specificity  
183 in which genes that are differentially expressed between one cell type and all others in our study (FDR <  
184 0.05 for each pairwise comparison) are considered cell type-specific for that cell type. We found that  
185 this more inclusive definition, which assigned many more genes to be cell type-specific, showed an even  
186 more significant ASE enrichment than the narrower definition (Fig. 2d). This result is not sensitive to the  
187 choice of FDR cutoff nor driven solely by a subgroup of highly expressed genes as it is well-preserved  
188 across FDR cutoffs (Supp Fig. 7) and different gene expression levels (Supp Fig. 8). This trend is also  
189 robust to separating samples into two groups and using one to define cell type-specific genes and the  
190 other to identify differentially expressed genes. This controls for spurious relationships that can result



191 when the same data are used to define two different quantities which are then compared (Supp Fig. 9)  
192 (Fraser, 2019).

193  
194 This enrichment (Fig. 2d) suggests that tissue-specific genes may have less constraint and/or more  
195 frequent positive selection on their expression. We reasoned that if the trend was solely driven by  
196 constraint, then controlling for constraint—even if imperfectly—would be expected to reduce the  
197 strength of the relationship. To investigate this, we binned genes by their variance in ASE across a large  
198 cohort of human samples which we have previously shown acts as a reasonable proxy for evolutionary  
199 constraint on gene expression (Castel et al., 2020; Starr et al., 2023). Across cell types, we generally  
200 observe significant enrichments in each bin and little difference in enrichment between bins, suggesting  
201 that differences in constraint on expression of cell type-specific vs. ubiquitously expressed genes are not  
202 solely responsible for our observations (Supp Fig. 10). Furthermore, we observe even stronger  
203 enrichments using an alternative constraint metric, the probability of haploinsufficiency score (pHI)  
204 likely due to the larger number of genes for which pHI can be calculated (Supp Fig. 11) (Collins et al.,  
205 2022). Overall, our analysis suggests that differences in constraint are unlikely to fully explain these  
206 trends, suggesting a potential role for positive selection.

207

### 208 **Lineage-specific selection has acted on tissue-specific gene expression divergence**

209

210 Next, we sought to use our RNA-seq data to identify instances of lineage-specific selection. We used a  
211 previously published method that incorporates a tissue-specific measure of constraint on gene  
212 expression to test whether groups of genes have likely been under selection (Starr et al., 2023). Using  
213 this strategy, we detected several signals of putative lineage-specific selection, some of which were cell  
214 type-specific (Additional file 2). Notably, the four most significant enrichments were found in motor

215 neurons and cardiomyocytes and are highly relevant to those cell types (Fig. 2e; Additional file 2). In  
216 cardiomyocytes, the top pathway was “PPAR signaling pathway” which has been shown to play an  
217 important role in the regulation of heart morphology and lipid metabolism (Montaigne et al., 2021). For  
218 example, *NR1H3* (also known as *LXRA*) is strongly upregulated in human cardiomyocytes as well as all  
219 other cell types (Supp Fig. 12a). Furthermore, this upregulation appears to have occurred in the human  
220 lineage based on data from non-hybrid cardiomyocytes as well as adult hearts (Supp Fig. 12b) (Blake et  
221 al., 2020; Pavlovic et al., 2018). Hybrid cells are essential in determining that the human-specific  
222 upregulation of *NR1H3* in cardiomyocytes has a strong genetic component as *NR1H3* expression is very  
223 responsive to diet and other environmental factors (Wang & Tontonoz, 2018).

224  
225 In motor neurons, multiple categories showed a strong bias toward higher chimpanzee expression  
226 including “sodium ion transmembrane transport” and “syntaxin binding”. The genes in these categories  
227 are of fundamental importance to the function of motor neurons as sodium ion transporters control  
228 excitability and syntaxin binding proteins play a major role in controlling the release of  
229 neurotransmitters from synaptic vesicles (Brose et al., 2019; Meisler et al., 2021). Interestingly, several  
230 key genes in these sets appear to have human-derived differences in expression that extend beyond  
231 motor neurons to other neuronal types. For example, *SCN1B*, *SCN2B*, and *SYT2* have chimpanzee-biased  
232 ASE in our MN data. Similarly, these genes have human-biased expression when comparing human,  
233 chimpanzee, and rhesus macaque glutamatergic cortical neurons in a previously published dataset (Supp  
234 Fig. 13) (Kozlenkov et al., 2020). We note that several other genes in these genes sets are not  
235 differentially expressed between humans and chimpanzees in this cortical neuron dataset, emphasizing  
236 the importance of studying individual neuron types (Kozlenkov et al., 2020). Overall, the strong bias in  
237 gene expression of sodium ion transporters and syntaxin binding proteins we observe suggests lineage-  
238 specific selection that may have altered the electrophysiological properties of human motor neurons.

239

240 **Patterns of allele-specific chromatin accessibility reveal divergent *cis*-regulatory elements**

241

242 While ASE provides insight into what gene expression changes might underlie phenotypic differences  
243 between humans and chimpanzees, in the absence of additional data it is very difficult to prioritize  
244 which specific mutations might cause expression divergence. To begin to fill this gap, we generated  
245 ATAC-seq data from five of the six cell types (all except RPE), with each cell type sequenced to an  
246 average depth of 184 million paired-end reads (Supp Fig. 14). ATAC-seq uses a hyperactive Tn5  
247 transposase to cleave DNA that is not bound by nucleosomes to enrich for accessible chromatin (Fig. 3a),  
248 a hallmark of active *cis*-regulatory elements (CREs) (Buenrostro et al., 2013; Corces et al., 2017). We  
249 estimated ASCA for individual open chromatin peaks by mapping reads to both species' reference  
250 genomes, correcting for mapping bias, generating a unified list of peaks across all samples, and then  
251 counting reads supporting each allele in each peak (see Methods). Cell types clustered well using PC1  
252 and PC2 of the ATAC-seq data, except for the HP sample which clustered closely with PP samples (Fig.  
253 3b, Supp Fig. 15). However, performing PCA on just the HP and PP samples clearly separates the two cell  
254 types (Supp Fig. 16). Within each cell type, species differences were clearly separated by PC1 or PC2  
255 (Supp Fig. 17). As an example of ASCA, the accessibility of the promoter of *CTSF* was strongly  
256 chimpanzee-biased, mirroring the chimpanzee-biased ASE for this gene (Fig. 3c).

257

258 As a first step in analyzing the ATAC-seq data, we intersected the peaks we identified with the genomic  
259 annotations of chromatin states. These fifteen categories, predicted across many tissues and cell types  
260 by the chromHMM model (Vu & Ernst, 2022), include terms such as "TSS" (transcription start site) and  
261 "enhancer". We then plotted the median of the absolute human-chimpanzee ASCA log fold-changes for  
262 each chromatin state and cell type (Fig 3d). The TSS and promoter annotations were the least divergent

263 in their accessibility, whereas regions of heterochromatin were the most divergent (Fig. 3d). To explore  
264 the relationship between interspecies differences in ASCA and ASE, we assigned peaks to the nearest  
265 TSS and computed the Pearson correlation between the allelic log fold-change of chromatin accessibility  
266 and expression within each cell type and chromatin state. As expected, TSS and promoter annotations  
267 showed the strongest correlation between ASCA and ASE, and correlations were stronger when  
268 including only differentially accessible peaks (Fig. 3e, Methods). Intriguingly however, ASCA of regions  
269 annotated as heterochromatin, polycomb repressed, or quiescent were as strongly correlated with ASE  
270 as elements identified as enhancers or DNase hypersensitivity sites (Fig. 3e). Notably this result is robust  
271 to how peaks and chromHMM annotations were intersected (Supp Fig. 18a), as well as to removal of all  
272 peaks even slightly overlapping TSS or promoter-related annotations (Supp Fig. 18b). Given that  
273 heterochromatin/quiescent regions are highly divergent in ASCA (Fig. 3d), this suggests that changes in  
274 accessibility of these regions may be particularly important in the evolution of gene expression.

275  
276 Next, we investigated whether the analog of the relationship between cell type-specific gene expression  
277 and ASE (Fig. 2d) holds for chromatin accessibility. Since the number of called peaks is largely dependent  
278 on sequencing depth (Supp Fig. 14, 19a), we performed down-sampling to equalize power to detect  
279 peaks across cell types (Supp Fig. 19b, Methods). We then called peaks on the down-sampled data and  
280 identified peaks as cell type-specific if they were called as peaks in only one cell type. In agreement with  
281 the gene expression data, we observed that cell type-specific peaks are enriched for ASCA across all cell  
282 types and this enrichment generally holds when using varying  $\log_2$  fold-change or p-value cutoffs (Supp  
283 Figs. 20-21). Analogous to our analysis of gene expression, we also applied a broader definition of cell  
284 type-specificity to the ATAC data, in which a peak was considered specific to a cell type if that peak had  
285 an absolute  $\log_2$  fold-change greater than a chosen threshold (e.g. 0.5 or 1) across all pairwise  
286 comparisons with other cell types. We observe strong enrichment for ASCA in cell type-specific peaks

287 using this definition except when using the most stringent cutoffs due to the very low number of peaks  
288 meeting these criteria (Supp Figs. 22-23, Methods). Finally, we observe the same enrichments when  
289 controlling for a recently published metric for constraint on non-coding elements, suggesting that  
290 differences in evolutionary constraint may not be solely responsible for the observed trends (Supp Fig.  
291 24) (S. Chen et al., 2022).

292  
293 We next explored the relationship between cell type-specific ASCA and ASE. To do this, we developed a  
294 novel metric called differential expression enrichment (dEE) to quantify how specific the log fold-change  
295 is to a particular cell type or tissue. Our method is based on expression enrichment (EE) (Yu et al., 2006),  
296 a metric that measures how specific gene expression is to a certain cell type/tissue. dEE estimates how  
297 cell type-specific ASE is for a gene (Supp Fig. 25, Methods) and, analogously, dCAE (differential  
298 chromatin accessibility enrichment) measures how cell type-specific ASCA is for a *cis*-regulatory element  
299 (Supp Fig. 26, Methods). dEE and dCAE are high in a cell type if there is a high absolute log fold-change in  
300 that cell type and much lower absolute log-fold changes or log fold-changes in the opposite direction in  
301 the other cell types. For example, dEE would be close to one for a gene in a cell type if the gene had  
302 strongly human-biased ASE in that cell type and very weakly human-biased or chimpanzee-biased ASE in  
303 the other cell types. On the other hand, if a gene did not have any strong allelic bias, that gene would  
304 have dEE close to zero. dEE is conceptually related to a metric we have previously introduced, diffASE,  
305 and generalizes diffASE to an arbitrary number of cell types and any assay that produces log fold-  
306 changes (Combs et al., 2018; Hu et al., 2022; York et al., 2018). Using these metrics, we identified 154  
307 instances in which a gene with cell type-specific ASE (i.e., high dEE) had a peak with cell type-specific  
308 ASCA in the same cell type (i.e., high dCAE, see Additional file 3 for the full list). Of these, 95 showed  
309 ASCA and ASE in the same direction which is more than expected by chance (77 expected;  $p < 0.005$ ,  
310 binomial test). These results suggest that tissue-specific *cis*-regulatory divergence in chromatin

311 accessibility may often impact tissue-specific gene expression, though this divergence is neither  
312 necessary nor sufficient to do so.

313

### 314 **Identifying candidate causal *cis*-regulatory variants by integrating ASE and ASCA across cell types**

315

316 As high dEE and dCAE in a given cell type might be indicative of a causal link between the change in  
317 chromatin accessibility and the change in expression, we focused on the 95 peak-gene pairs with  
318 matching direction and used two different strategies to identify examples to investigate in detail. First,  
319 we prioritized genes known to play important roles in development. For example, we found that the  
320 promoter of *FABP7* has human-biased ASCA specifically in motor neurons (Fig. 4a-b) and that the *FABP7*  
321 gene has human-biased ASE in motor neurons (Fig 4c). *FABP7* is used as a marker of glial cells and neural  
322 progenitor cells (NPCs) and plays a key role in NPC proliferation and astrocyte function (Arai et al., 2005;  
323 De Rosa et al., 2012; Ebrahimi et al., 2016; Watanabe et al., 2007). Using previously published single-  
324 nucleus RNA-seq data from humans, chimpanzees, and rhesus macaques, we confirmed that *FABP7*  
325 shows a human-derived up-regulation in several neuronal subtypes but not glial cells (Supp Fig. 27) (Ma  
326 et al., 2022). To investigate the genetic basis of this cell type-specific divergence, we leveraged a  
327 machine learning model, Sei (K. M. Chen et al., 2022), to nominate potentially causal variants in the  
328 promoter of *FABP7* (see Methods). Sei is a deep neural network that takes DNA sequence as input and  
329 predicts the probability that the sequence has a particular epigenetic state in a variety of cell types and  
330 tissues (Fig. 4d) (K. M. Chen et al., 2022). While single-base substitutions differing between human and  
331 chimpanzee had only minor impacts on predicted *cis*-regulatory activity, “chimpanizing” the human  
332 sequence of the *FABP7* promoter at two small indels (by deleting one base at chr6: 122,779,291 and  
333 inserting three bases at chr6: 122,779,115) was sufficient to make the Sei predictions for the  
334 chimpanized human sequence closely match the predictions for the complete chimpanzee sequence

335 (Fig. 4e-g). Making only one of these changes had substantial but weaker effects in both cases,  
336 suggesting that both mutations might be functionally important (Fig. 4f,g). The 1-base insertion in the  
337 human lineage introduces a binding site for the neuronally expressed transcription factors GLIS2/3,  
338 suggesting a potential molecular mechanism (Calderari et al., 2018; Castro-Mondragon et al., 2022; Ke  
339 et al., 2015).

340  
341 As another approach to ranking the 95 peaks, we searched for peaks containing human-chimpanzee  
342 sequence differences in otherwise highly conserved genomic positions, since these could reflect changes  
343 in selective pressure. Using PhyloP scores for 241 placental mammals (Sullivan et al., 2023) to assess  
344 conservation, one of the top-ranked peaks was a putative enhancer six kilobases away from the TSS of  
345 *GAD1*, which plays a key role in the synthesis of the neurotransmitter GABA (Feldblum et al., 1993).  
346 Notably, part of this peak has been classified as a human accelerated region (HAR) (Girskis et al., 2021;  
347 Hubisz & Pollard, 2014; Pollard et al., 2006)—a short sequence that is highly conserved in mammals yet  
348 contains an unusual number of human-specific mutations. Both the accessibility in the peak and *GAD1*  
349 expression are only chimpanzee-biased in motor neurons (Fig. 4a-c, Supp Fig. 28). Applying Sei to  
350 estimate the predicted effect of every variant in this region, we found that a single-nucleotide  
351 substitution within the HAR (chr2: 170,823,193) has by far the largest predicted cis-regulatory effect and  
352 most closely matches the differences in Sei predictions between the full human and chimpanzee  
353 haplotypes (Fig. 4d-g). Interestingly, this mutation is predicted to disrupt a binding site for several basic  
354 helix-loop-helix transcription factors that play essential roles in neuronal differentiation such as *Ascl1*  
355 (Supp Fig. 29) (Castro-Mondragon et al., 2022; Mizuguchi et al., 2006; Yang et al., 2017).

356  
357 As *GAD1* is only highly expressed in GABAergic neurons (and was therefore lowly expressed in the cell  
358 types studied here, Supp Fig. 30a), we investigated whether this reduced expression of human *GAD1*

359 also occurs in cortical organoids which contain GABAergic neurons together with other cell types in  
360 which *GAD1* is not highly expressed. We analyzed our previously published data from human-  
361 chimpanzee hybrid cortical organoids (Agoglia et al., 2021) and found that the expression of *GAD1* from  
362 the chimpanzee allele spikes higher than that of the human allele around day 50 of hybrid cortical  
363 organoid differentiation before dropping in expression over time to match the human expression level  
364 (Supp Fig. 30b). Because ASE in the hybrid cells controls for any potential interspecies differences in  
365 differentiation kinetics or cell type composition, this difference must be the result of *cis*-regulatory  
366 divergence between humans and chimpanzees. This expression difference is also more pronounced in  
367 comparisons of human and chimpanzee parental cortical organoids, with a higher absolute log fold-  
368 change at day 50, day 100, and day 150, only returning to equal expression at day 200 (Supp Fig. 30c).  
369 While this could be due to differences in cell type proportion between human and chimpanzee  
370 organoids, it might also be due to a reinforcing *trans*-acting effect.

371  
372 To test whether this difference in expression also occurs specifically during GABAergic neuron  
373 differentiation we examined *GAD1* expression in single cell RNA-seq data from human and chimpanzee  
374 cortical organoids (Kanton et al., 2019). We observed a spike in *GAD1* expression in less mature  
375 chimpanzee GABAergic neurons that is absent in the corresponding part of the trajectory in human  
376 neurons (Supp Fig. 31). Notably, a similar trend holds regardless of which GABAergic sub-trajectory (i.e.,  
377 equivalent to GABAergic neurons from the caudal, lateral, or medial ganglionic eminences) is examined  
378 suggesting this difference is not unique to a particular type of GABAergic neuron (Supp Fig. 31). Finally,  
379 we examined the accessibility of the putative *GAD1* enhancer more closely. Consistent with a potential  
380 role for this enhancer in the spike in *GAD1* expression during development, the accessibility of this  
381 enhancer mirrors the expression of *GAD1* in human cortical and striatal organoids (Supp Fig. 32) with  
382 high accessibility between day 50 and day 100 before decreasing somewhat near day 150 (Trevino et al.,



383 2020). Overall, our results demonstrate how the combination of RNA-seq, ATAC-seq, and machine  
384 learning models can nominate variants that may be responsible for cell type-specific changes in gene  
385 expression and chromatin accessibility.

386

## 387 **Discussion**

388

389 In this study, we quantified human-chimpanzee *cis*-regulatory divergence in gene expression and  
390 chromatin accessibility in six different cell types representing diverse developmental lineages. Across the  
391 thousands of genes with ASE, we found that most *cis*-regulatory divergence is specific to one or a few  
392 cell types. Furthermore, we found that divergent *cis*-regulation is linked to tissue-specificity, with tissue-  
393 specific genes being enriched for ASE and tissue-specific regulatory elements being enriched for ASCA.

394 As this result was largely unchanged when stratifying by evolutionary constraint, our results suggest that  
395 changes in the expression of genes with more cell type-specific expression patterns may be less  
396 deleterious than changes in more broadly expressed genes, supporting the idea that cell-type specific  
397 divergence may be less pleiotropic (Wittkopp & Kalay, 2012). Overall, this suggests that broad changes  
398 in expression in cell type-specifically expressed genes may be an important substrate for evolution.

399

400 We also identified several sets of genes evolving under lineage-specific selection that may have played a  
401 role in establishing unique facets of human physiology and behavior. Most interestingly, we found  
402 evidence for selection on sodium ion transporters and syntaxin binding proteins that may alter the  
403 electrophysiological properties of motor neurons, and potentially other types of neurons as well (Brose  
404 et al., 2019; Meisler et al., 2021). The complexity of the molecular machinery regulating neuronal  
405 excitability and synaptic vesicle release make it difficult to say what the effects of these gene expression  
406 changes are on the excitability of motor neurons without electrophysiology data from human and great

407 ape neurons coupled with perturbation of candidate genes. However, given the divergence in  
408 locomotion and motor skills between humans and chimpanzees, it is tempting to speculate that these  
409 changes may have had some role in the evolution of motor control and learning in humans.

410  
411 In this work, we developed two metrics—dEE and dCAE—to quantify the degree of cell type-specific  
412 differential expression and accessibility. These metrics are largely analogous to widely used metrics that  
413 quantify tissue- or cell type-specific expression level and applicable to any comparison of log fold-  
414 changes across conditions. They markedly improved our ability to identify matching cell type-specific  
415 ASE and ASCA and led to the identification of 95 peak-gene pairs that had highly cell type-specific  
416 concordant changes in accessibility and expression.

417  
418 One such example is a potentially human-derived increase in *FABP7* expression in several types of  
419 human neurons. As *FABP7* is not highly expressed in adult mouse neurons, the functional consequences  
420 of its higher expression in human neurons are difficult to predict (Yao et al., 2021). *FABP7* plays a role in  
421 the uptake of the fatty acid Docosahexaenoic Acid (DHA), an important component of neuronal  
422 membranes (Akbar et al., 2005; Choi et al., 2021). DHA promotes neuronal survival through  
423 phosphatidylserine accumulation, so it is possible that the human-specific *FABP7* expression increases  
424 neuronal DHA uptake leading to reduced apoptosis in human neurons during development and  
425 ultimately contributing to a larger number of neurons in humans (Akbar et al., 2005; Choi et al., 2021).

426  
427 In addition, we identified a highly conserved developmentally dynamic enhancer near *GAD1* that may  
428 have partially lost activity in the human lineage resulting in a decrease in *GAD1* expression early in  
429 GABAergic neuron development. By integrating with the deep learning model Sei, we identified a variant  
430 that may account for the chimpanzee-biased ASCA in this region (K. M. Chen et al., 2022). Interestingly,

431 the ASE of *GAD1* was coupled with a relatively small (though significant) magnitude of ASCA. This could  
432 potentially reflect divergence in transcription factor binding that leaves a “footprint” resulting in subtle  
433 ASCA (Vierstra et al., 2020). Overall, our data suggest that this enhancer has lost activity in the human  
434 lineage, potentially altering the expression pattern of *GAD1* during neuronal development. *GAD1* is the  
435 rate-limiting enzyme for GABA synthesis so GABA levels are likely responsive to changes in *GAD1*  
436 expression (Feldblum et al., 1993). GABA release has complex context-specific effects on  
437 neurodevelopment making it difficult to speculate as to what the phenotypic effects of reduced GABA  
438 synthesis during human neurodevelopment might be (Ben-Ari et al., 2012). However, the high  
439 conservation of this *cis*-regulatory element in placental mammals implies that its human-specific  
440 disruption is likely to have important neurodevelopmental effects. Careful perturbation of this enhancer  
441 and *GAD1* expression in mouse models will be required to explore this further.

442

443 Overall, our study provides foundational data, insight, and computational tools that will improve our  
444 understanding of cell type-specific *cis*-regulatory evolution and the role it has played in the  
445 establishment of human-specific traits.

446

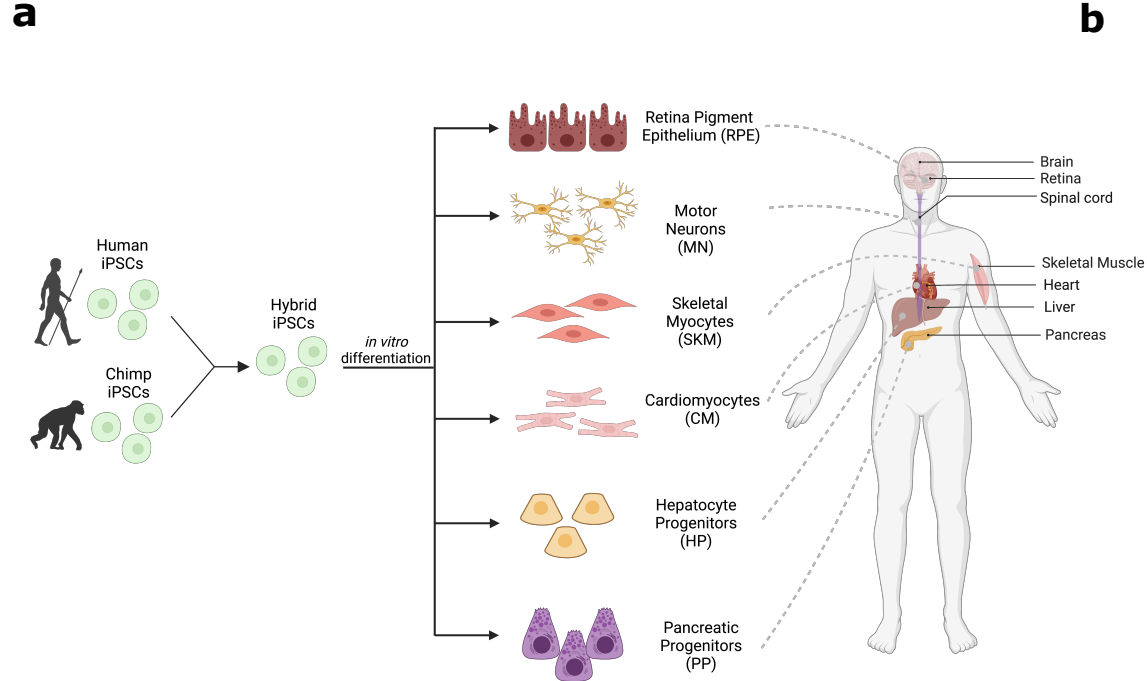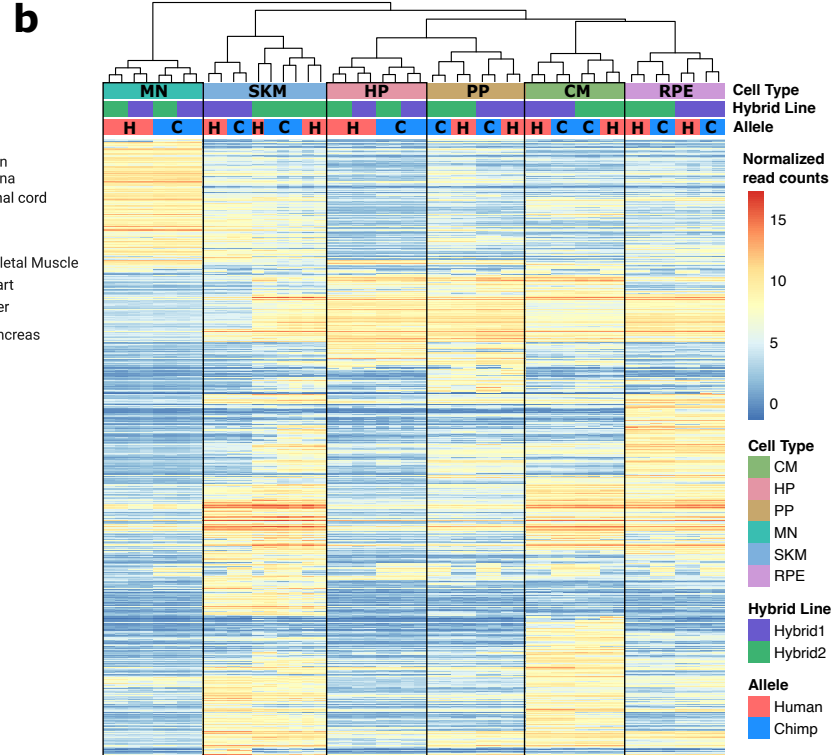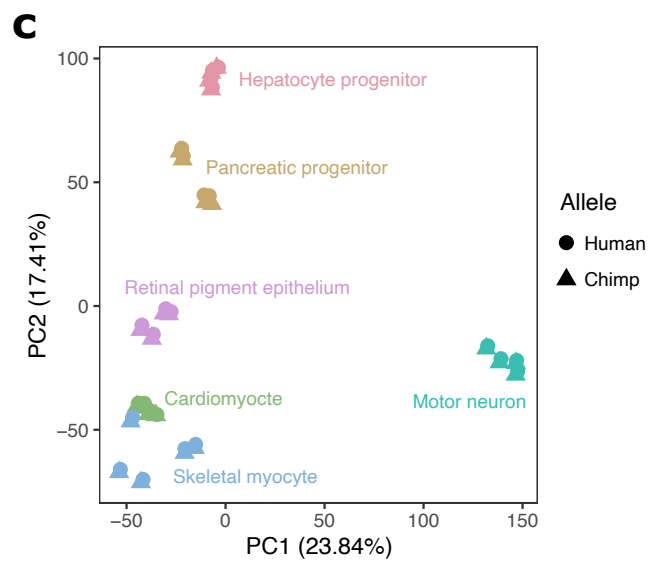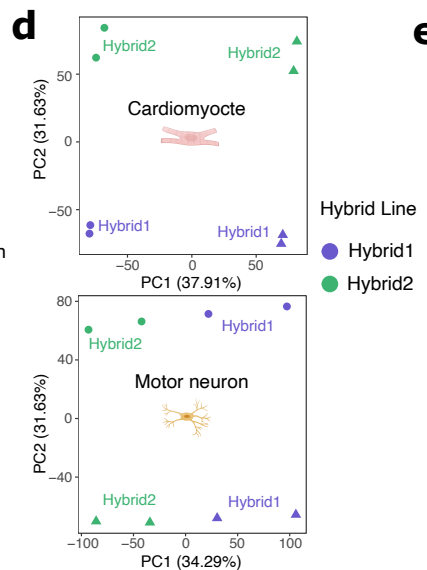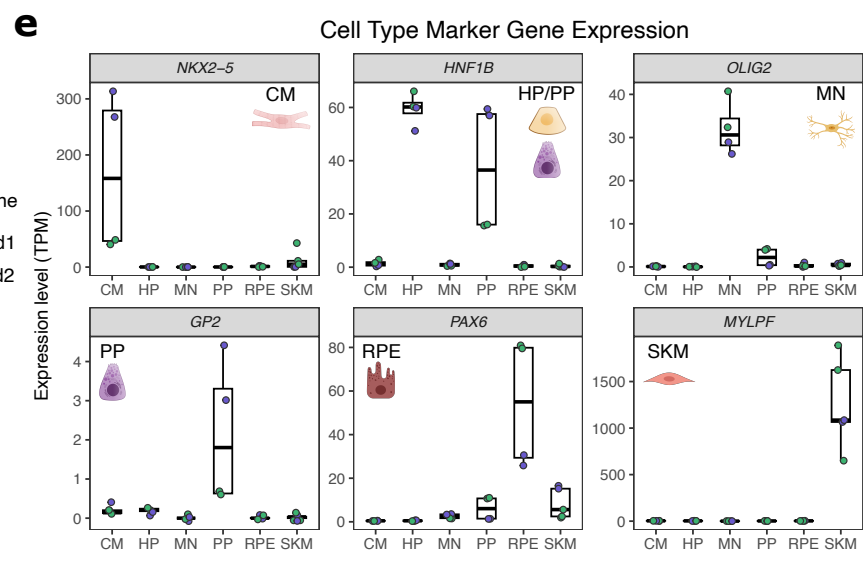

446 **Figure 1: Allele-specific expression across diverse human-chimpanzee hybrid cell types. a)** Six cell types  
447 were differentiated from human-chimpanzee hybrid induced pluripotent stem cells. These six cell types  
448 represent diverse body systems, including motor neurons for the central nervous system, retinal  
449 pigment epithelium for eye, skeletal myocytes for skeletal muscle, cardiomyocytes for the heart,  
450 hepatocyte progenitors for the liver, and pancreatic progenitors for the pancreas. **b)** Heatmap showing  
451 the result of hierarchical clustering performed on genes with highly variable normalized allele counts. **c)**  
452 Result of running PCA on normalized allelic counts for all samples and cell types. **d)** Result of PCA  
453 performed on normalized allele counts for each individual cell type separately. Cardiomyocytes and  
454 motor neurons are shown here. **e)** Expression of marker genes for each cell type.

**a**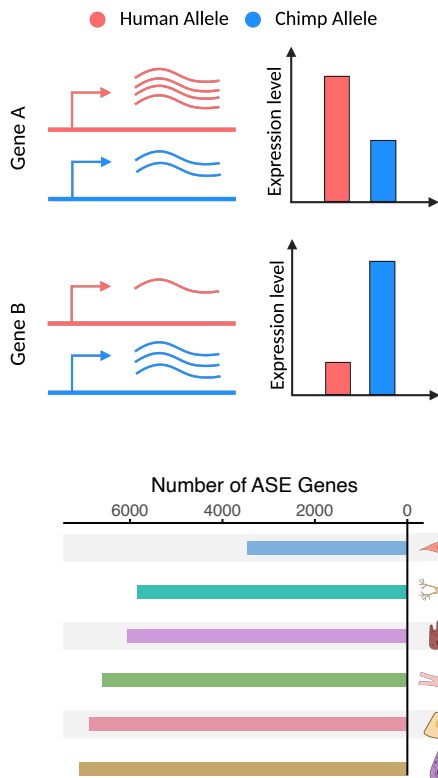**b**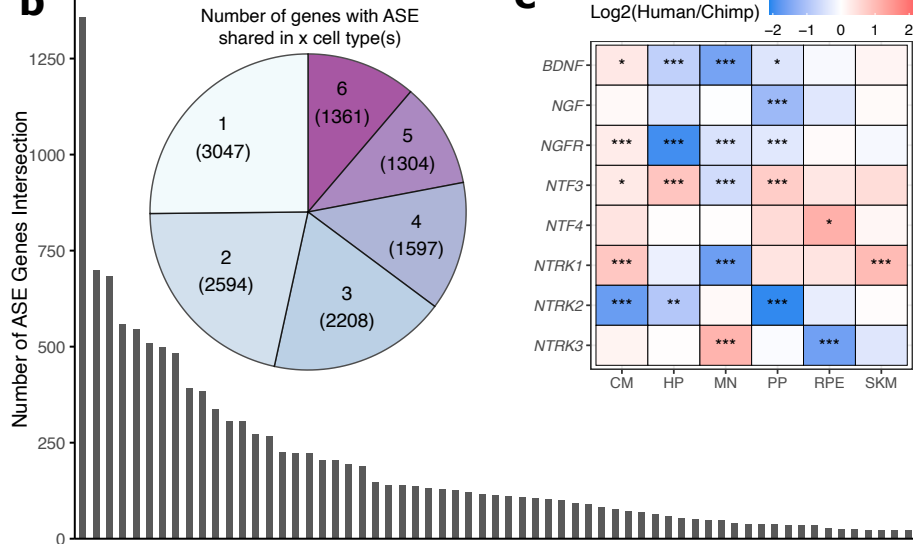**c**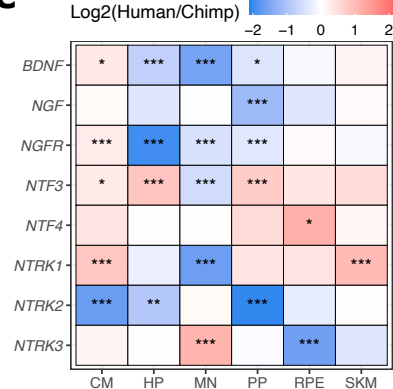**d**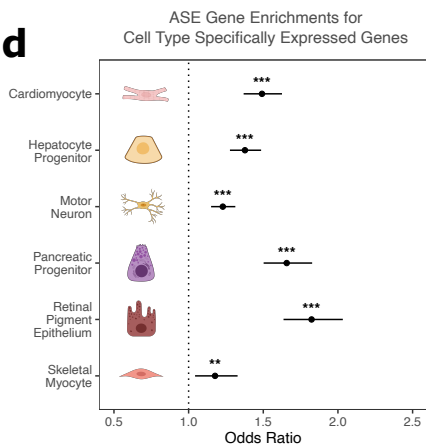**e**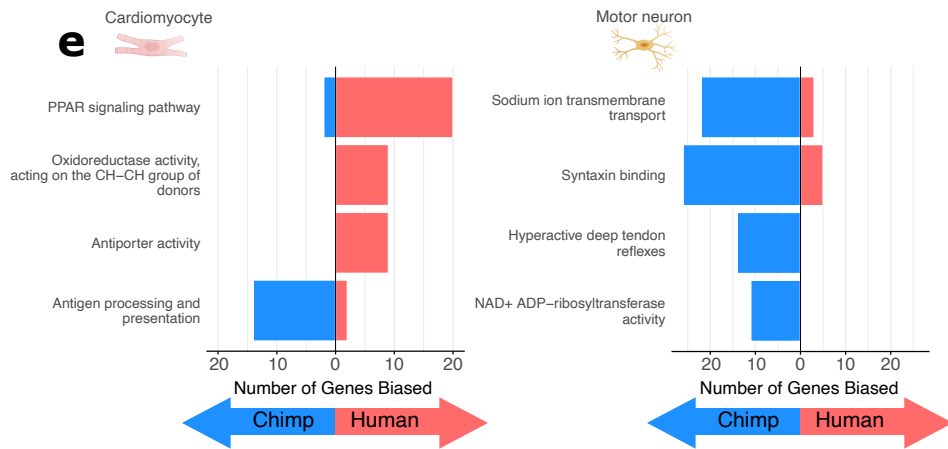

455 **Figure 2: Human-chimpanzee ASE is largely cell type-specific. a)** Outline of measurement of allele-  
456 specific expression. Reads from the human and chimpanzee alleles are counted and differences in read  
457 counts identified. **b)** Thousands of genes with ASE were identified for each cell type, with many genes  
458 only showing ASE in a single cell type (Conway et al., 2017). **c)** The neurotrophins and their receptors as  
459 examples of genes showing cell type-specific ASE patterns. DESeq2 estimate of  $\log_2$  fold-change  
460 (human/chimpanzee) are shown in the heatmap and significance is indicated by asterisks where \*\*\*  
461 indicates  $FDR < 0.005$ , \*\* indicates  $FDR < 0.01$ , and \* indicates  $FDR < 0.05$ . Zero asterisks (i.e. a blank  
462 box) indicates  $FDR > 0.05$ . **d)** Plot showing that genes with ASE are enriched for genes showing cell type-  
463 specific expression patterns across all cell types. Asterisks indicate p-values rather than FDR using the  
464 same system as in 2c. **e)** Top gene sets with evidence for lineage-specific selection in cardiomyocytes  
465 and motor neurons are shown. The length of the bars indicates the number of genes in a category with  
466 biased expression in each cell type.  
467

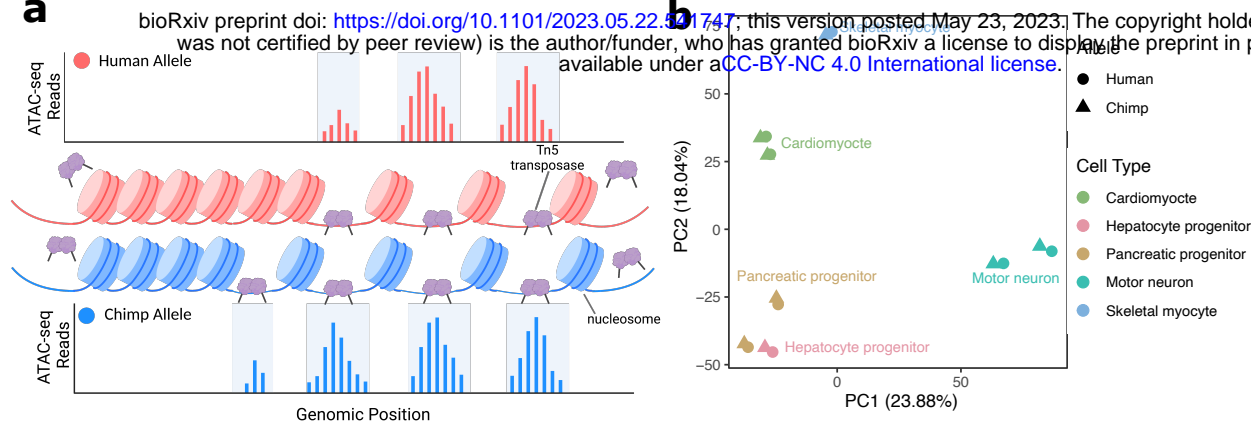

Cell Type Allele-Specific Chromatin Accessibility Allele-Specific Expression

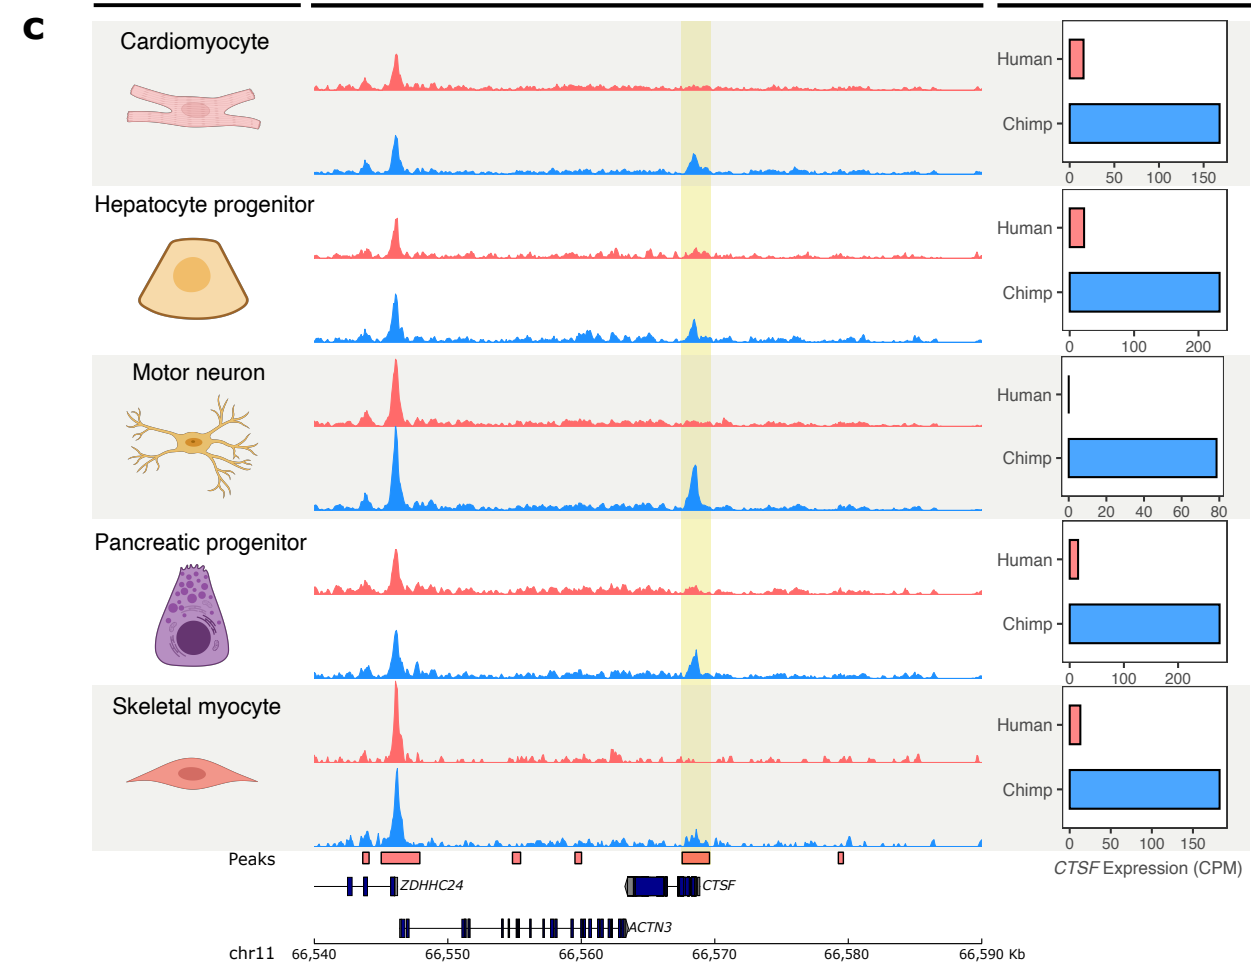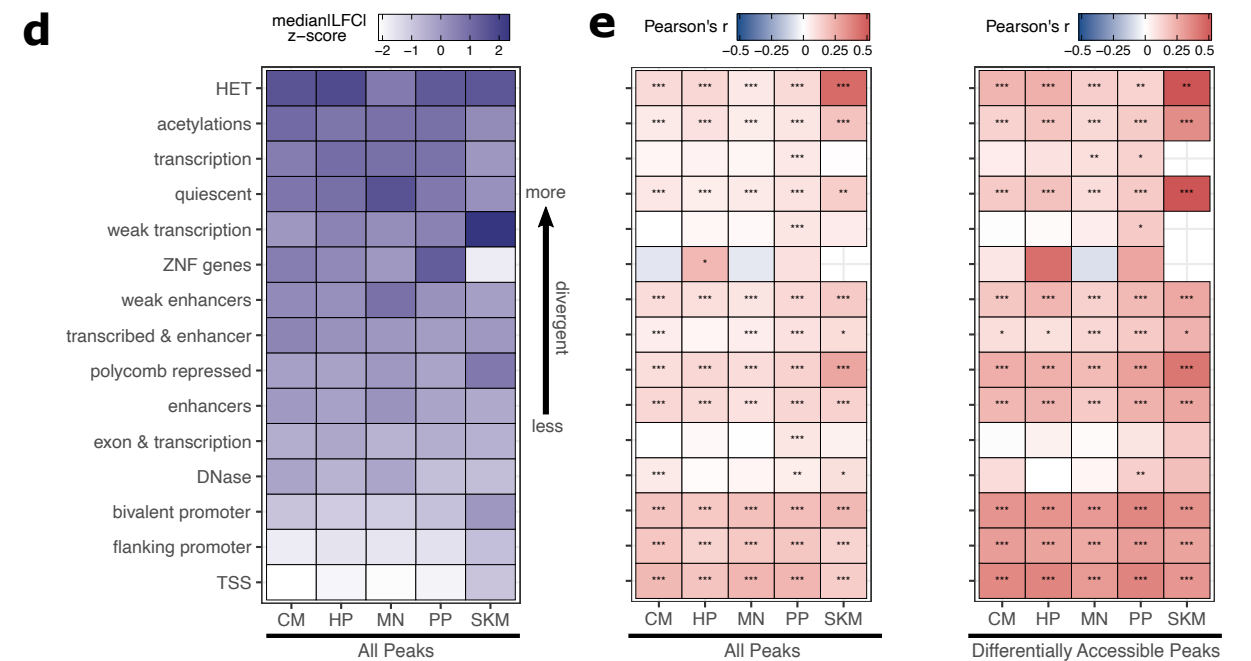



468 **Figure 3: Allele-specific chromatin accessibility across diverse human-chimpanzee hybrid cell types. a)**

469 Schematic outlining the ATAC-seq protocol. A hyperactive transposase cleaves accessible DNA and adds

470 adapters enabling measurement of chromatin accessibility. **b)** PCA on normalized allelic counts from

471 ATAC-seq. **c)** ASCA in the promoter of *CTSF*, and ASE for the *CTSF* gene. **d)** Differences in ASCA were

472 quantified and plotted separately based on chromHMM annotation. The order is based on the median

473 of z-score transformed absolute log fold-change between human and chimpanzee across all cell types,

474 with higher z-scores indicating greater divergence in accessibility. **e)** Pearson correlation between ASE

475 and ASCA for all cell types with all peaks (left) or only differentially accessible peaks (right, defined as

476 peaks with nominal binomial p-value less than 0.05). Pearson's r values are shown in the heatmap and

477 significance is indicated by asterisks where \*\*\* indicates  $p < 0.005$ , \*\* indicates  $p < 0.01$ , and \* indicates

478  $p < 0.05$ . Zero asterisks (i.e. a blank box) indicates  $p > 0.05$ .

479

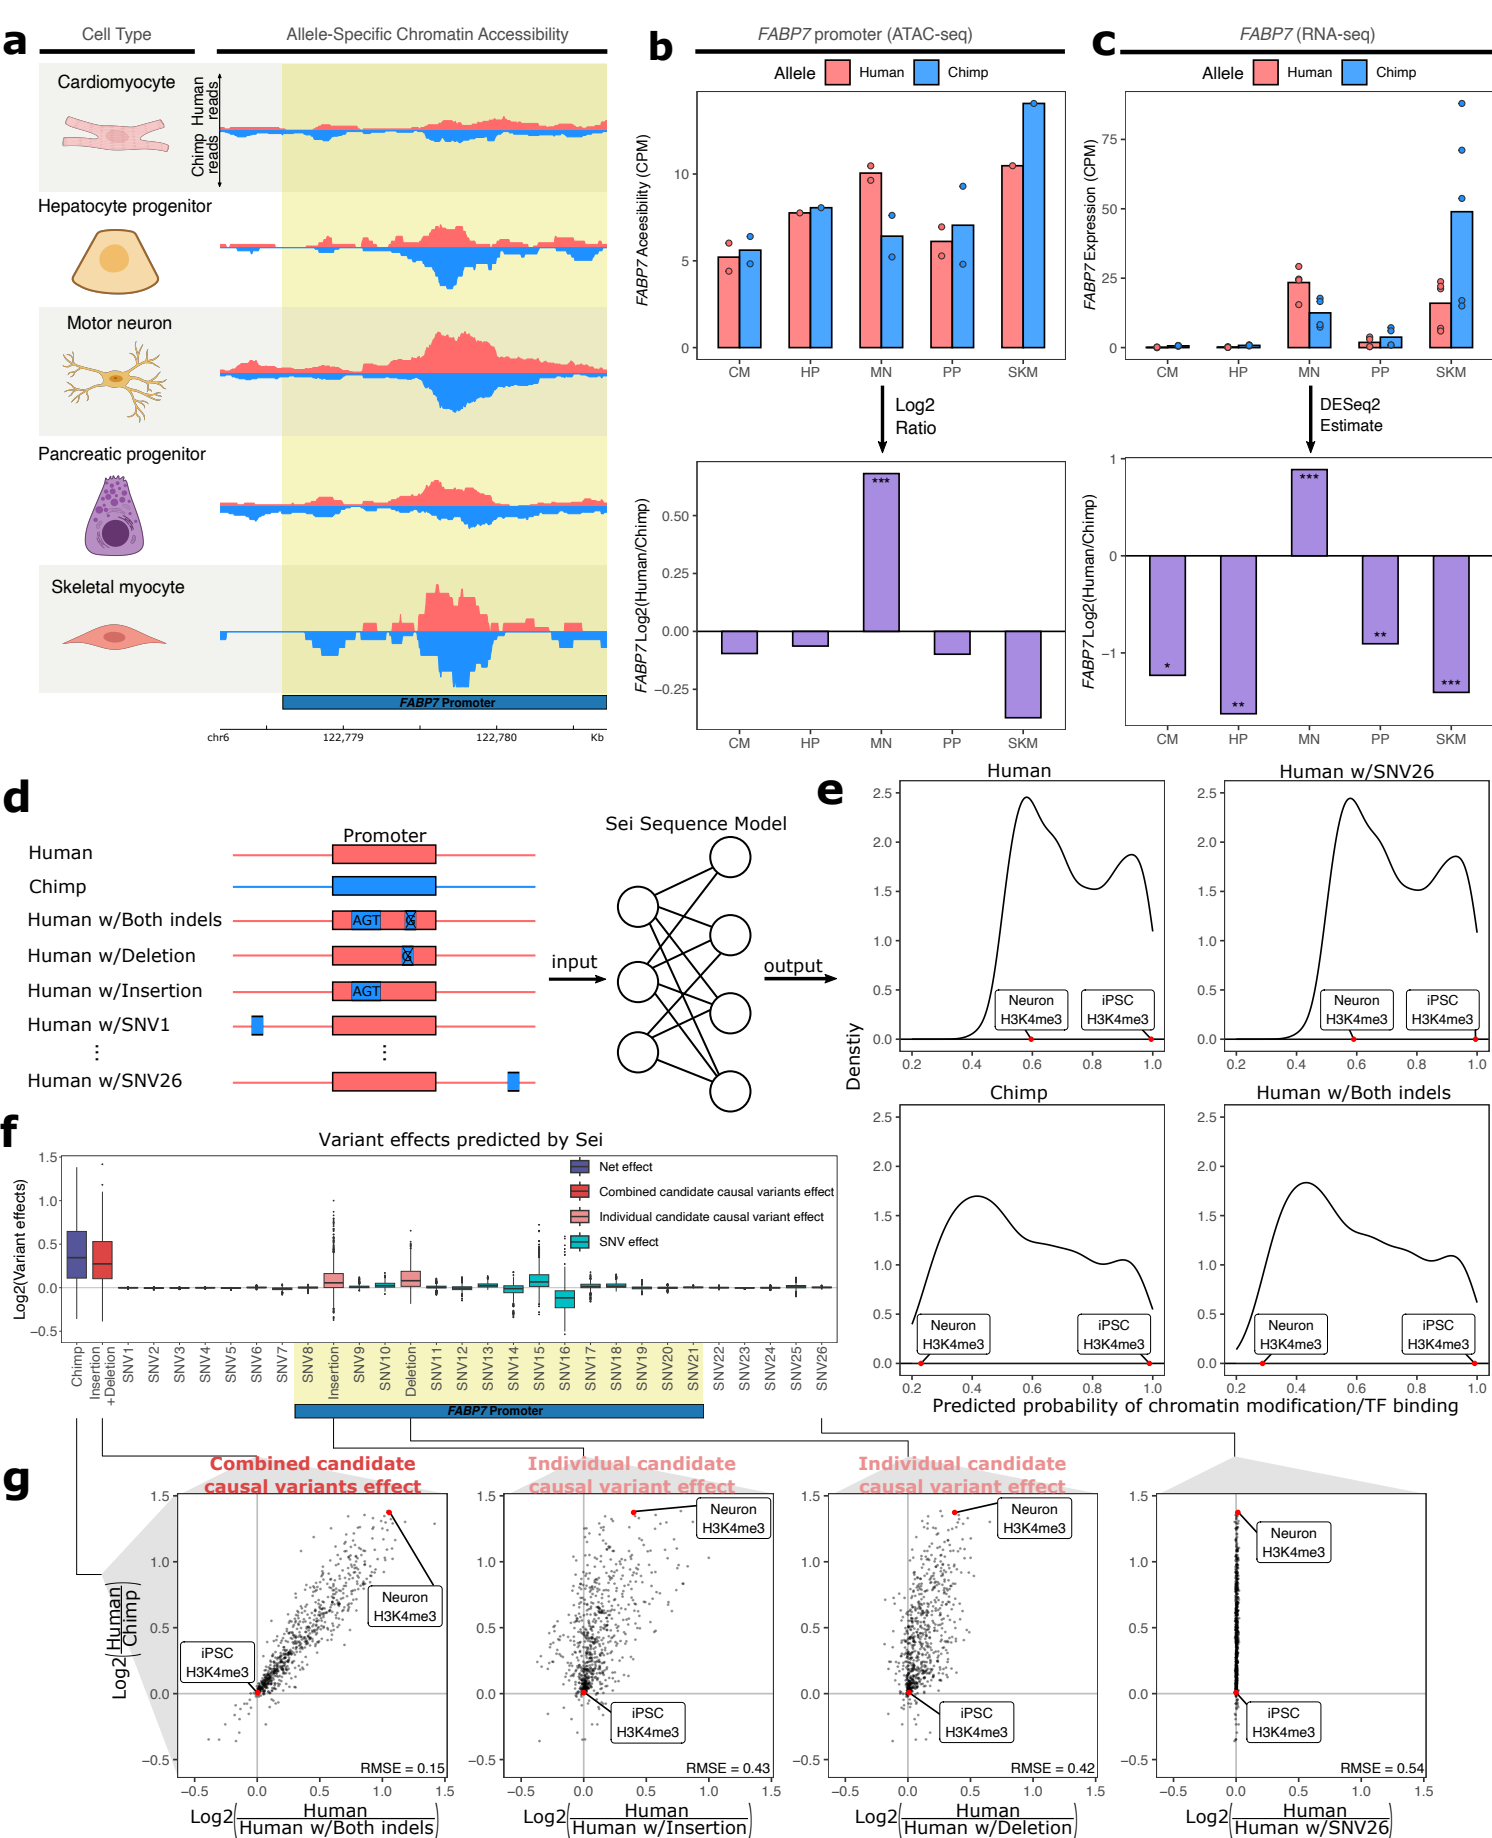

480 **Figure 4: Motor neuron-specific human-biased ASE and ASCA for *FABP7* and the promoter of *FABP7*. a)**

481 Allelic ATAC-seq tracks are shown in the peak containing the annotated *FABP7* promoter (highlighted in  
482 yellow). **b)** The top panel shows allelic CPM of the *FABP7* promoter across cell types and the bottom  
483 panel shows the log fold-change across cell types. **c)** The top panel shows allelic CPM of the *FABP7* gene  
484 across cell types and the bottom panel shows the log fold-change across cell types. **d)** Outline of the  
485 process for variant effect prediction with Sei for *FABP7*. All sequences input to Sei were centered at the  
486 *FABP7* promoter. The human sequence, chimpanzee sequence, and partially “chimpanized” human  
487 sequences (modified by systematically switching the human allele to the chimpanzee allele separately  
488 for each human-chimpanzee difference) were fed into Sei to predict the effects of these variants on  
489 chromatin state. **e)** Histogram of the probabilities of various chromatin states and transcription factor  
490 binding predicted by Sei was plotted for the human sequence, the chimpanzee sequence, and the  
491 human sequence with one human-chimpanzee difference swapped to match the chimpanzee sequence.  
492 The human sequence with SNV26 changed to the chimpanzee allele and the human sequence switched  
493 at both indels are shown as examples. A histone modification (H3K4me3) predicted in two cell types was  
494 labeled to illustrate how the predictions depend on both input sequence and cell type. **f)** Plot of the  
495 predicted effects of all single nucleotide differences and indels between the human and chimpanzee  
496 genomes in the Sei input window (the *FABP7* promoter is highlighted in yellow). **g)** Scatterplots showing  
497 the correlation of the effects of both indels (left panel), each individual indel (middle two panels), and a  
498 representative SNV (right panel) on Sei predictions with the difference in Sei predictions between the  
499 human and chimpanzee sequences. The root mean square error (RMSE) was computed and shown in  
500 each figure.

501

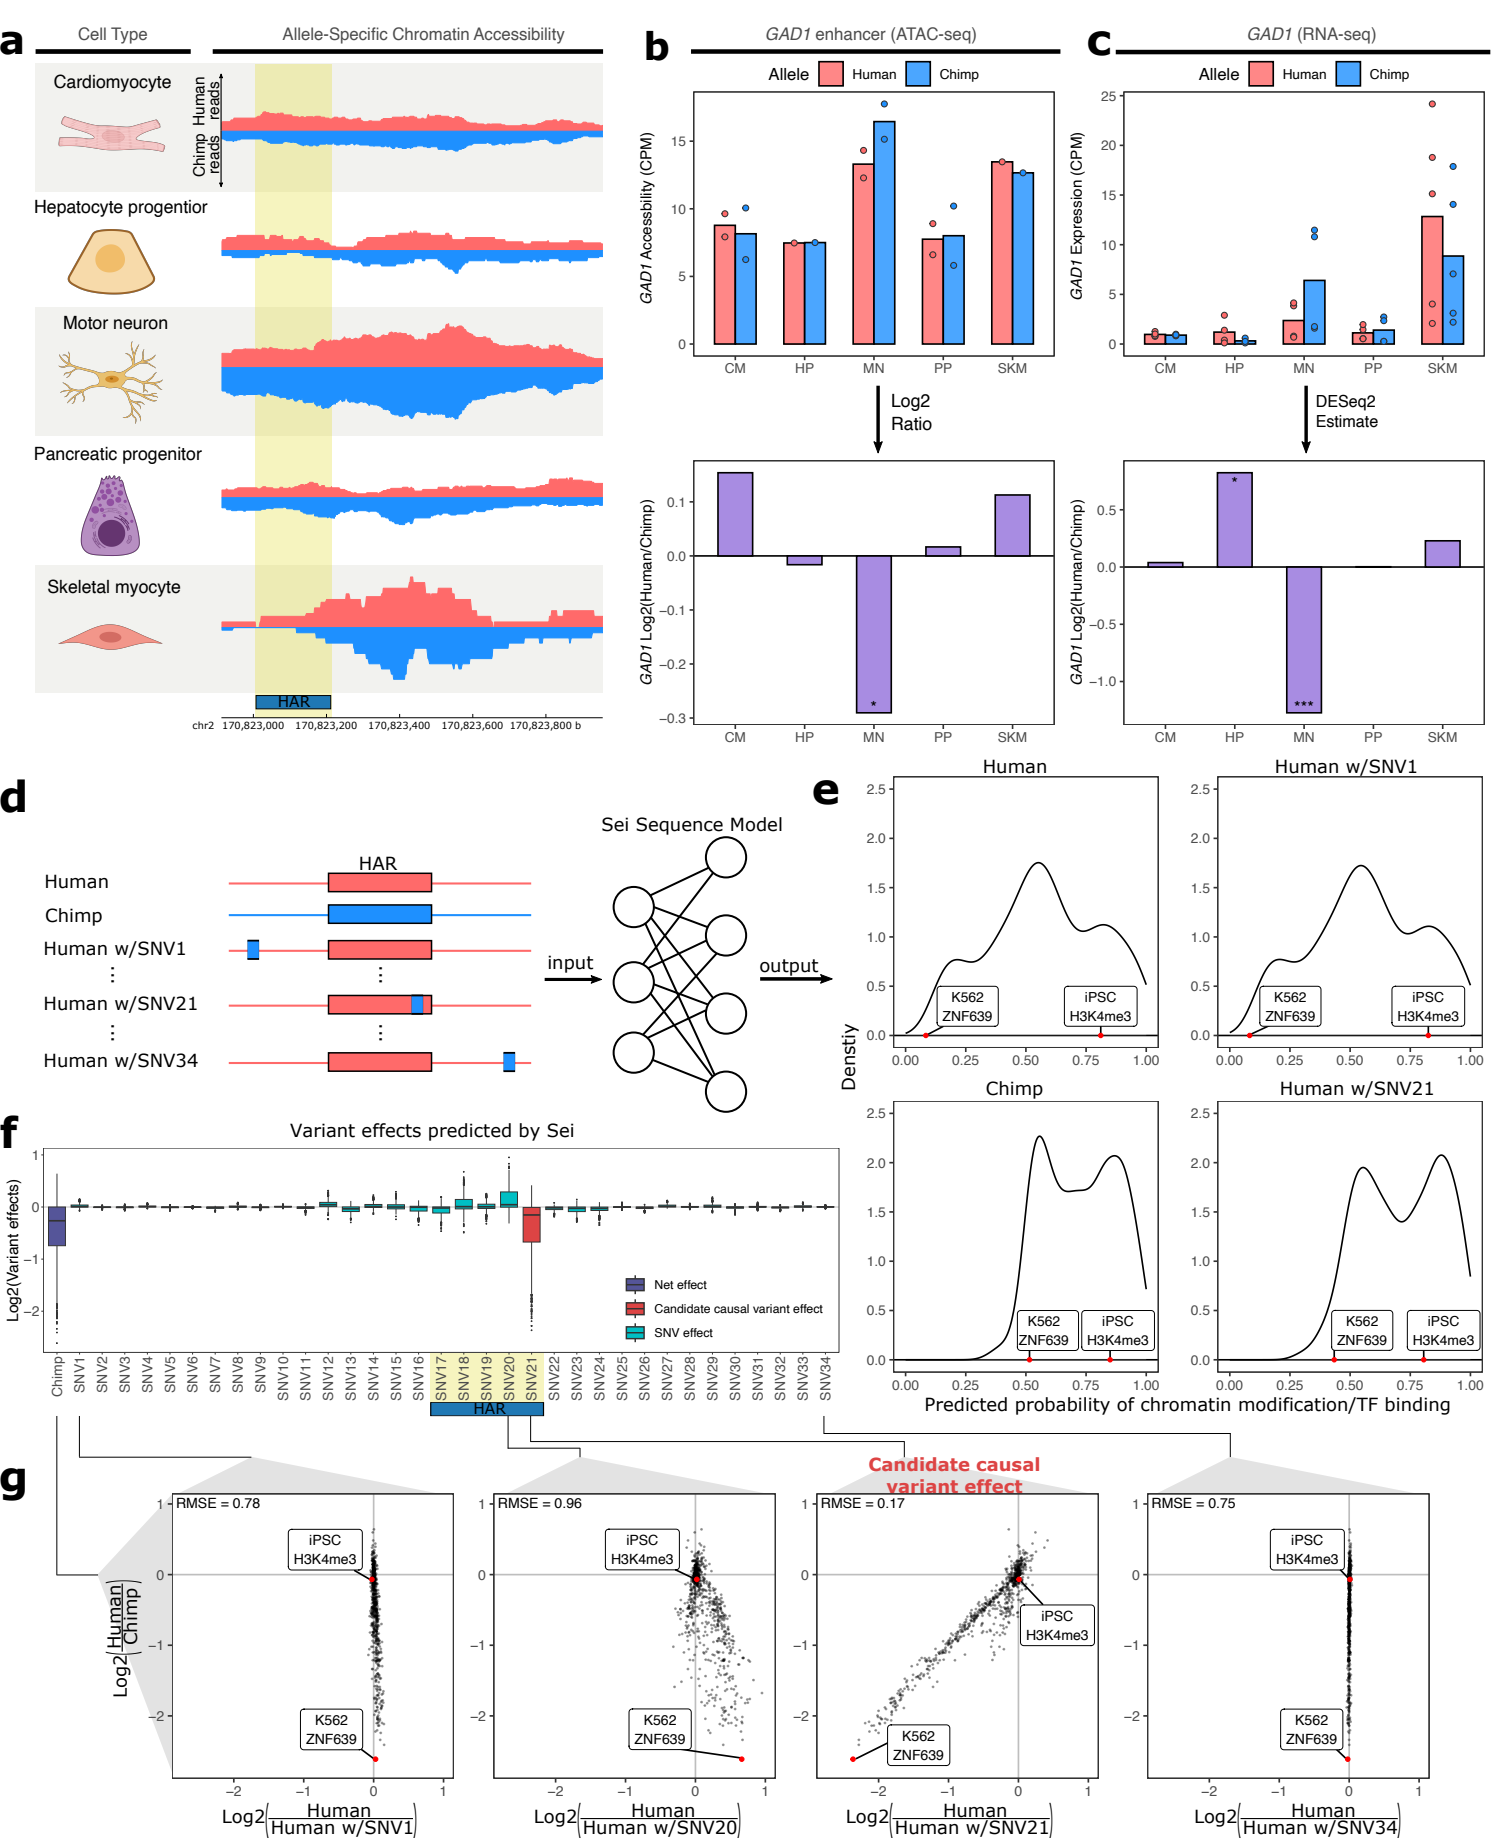

502 **Figure 5: Motor neuron-specific chimpanzee-biased ASE for *GAD1* and *ASCA* for a HAR near the *GAD1***  
503 **TSS. a)** Allelic ATAC-seq tracks are shown for the peak near the *GAD1* TSS that contains a HAR  
504 (highlighted in yellow). **b)** The top panel shows allelic CPM of the CRE near the *GAD1* TSS across cell  
505 types and the bottom panel shows the log fold-change across cell types. **c)** The top panel shows allelic  
506 CPM of the *GAD1* gene across cell types and the bottom panel shows the log fold-change across cell  
507 types. **d)** Outline of the process for variant effect prediction with Sei for *GAD1*. All input sequences to Sei  
508 were centered at the HAR. The human sequence, the chimpanzee sequence, and modified sequences  
509 with the human sequence altered at each substitution to match the chimpanzee sequence were fed into  
510 the Sei sequence model to predict the effects of these variants on the chromatin state. **e)** Histogram of  
511 the probabilities of various chromatin states and transcription factor binding predicted by Sei was  
512 plotted for the human sequence, the chimpanzee sequence, and two examples in which the human  
513 sequence with only one SNV “chimpanized” (human w/SNV) was input to Sei. The histogram of the  
514 probability of the sequence having a particular epigenomic annotation (predicted by Sei) was plotted for  
515 human, chimpanzee, human w/SNV1 changed to match the chimpanzee sequence, and human w/SNV21  
516 changed to match the chimpanzee sequence. Two epigenomic annotations were labeled as examples  
517 that show the different values output by Sei with these two different sequence inputs. **f)** Plot of the  
518 predicted effects of all single nucleotide differences between human and chimpanzee in the Sei input  
519 window centered at the HAR (highlighted in yellow). Positions were switched to the chimpanzee allele  
520 individually. **g)** Scatterplots showing the correlation of the effects of four SNVs on Sei predictions with  
521 the difference in Sei predictions between the human and chimpanzee sequences. The root mean square  
522 error (RMSE) was computed and shown in each figure.

524 **Methods:**

525 **Generation of multiple human-chimpanzee hybrid cell types**

526 We used two previously described human-chimpanzee hybrid iPS cell lines ( hybrid1 and hybrid2,  
527 previously denoted Hy1-25 and Hy1-30 respectively) (Agoglia et al., 2021). Before differentiation, cells  
528 were routinely cultured on matrigel in mTeSR1 or mTeSR Plus (Stem Cell Technologies cat #85850 or cat  
529 #100-0276). Culture and *in vitro* differentiation of iPS cells into six cell types (motor neurons (MN),  
530 cardiomyocytes (CM), hepatocyte progenitors (HP), pancreatic progenitors (PP), skeletal myocytes  
531 (SKM), and retinal pigment epithelium (RPE)) was carried out by the Columbia Stem Cell Core Facility  
532 using published protocols (BurrIDGE et al., 2014; Chal et al., 2016; Korytnikov & Nostro, 2016; Mallanna  
533 & Duncan, 2013; Maury et al., 2015; Sharma et al., 2019).

534

535 **Preparation of RNA-seq libraries**

536 All samples were cryopreserved in liquid nitrogen before RNA extraction (Milani et al., 2016). Cells were  
537 gently thawed and then washed with PBS and cell pellets were collected via centrifugation at 1,000 RPM  
538 for 5 minutes. Cell pellets were loosened by flicking the tube and an appropriate volume of Buffer RLT  
539 based on the cell count were added following the RNeasy Mini Kit (Qiagen, 74104) protocol. Total RNA  
540 extraction and on-column DNase digestion were performed using RNeasy Mini Kit (Qiagen, 74104) and  
541 RNase-Free DNase Set (Qiagen, 79254). RNA quality was assessed using the Agilent Bioanalyzer RNA Pico  
542 assay. Only samples with an RNA integrity number (RIN) greater than or equal to 7 were used to prepare  
543 cDNA libraries. All RNA-seq libraries except 3 motor neuron libraries (2 hybrid2 and 1 hybrid1) were  
544 prepared using the TruSeq Stranded mRNA kit (Illumina, 20020594) and the TruSeq RNA CD Index Plate  
545 (Illumina, 20019792) from between 100 ng and 1 ug total RNA following the manufacturer's protocols.  
546 The other three motor neuron libraries were prepared using Illumina Stranded mRNA Prep (Illumina,  
547 20040532) and IDT for Illumina RNA UD Indexes Set A, Ligation (Illumina, 20040553) due to low yield of

548 total RNA. Notably, the four motor neuron libraries did not cluster by library preparation method. All  
549 libraries were normalized, pooled at an equimolar ratio using Qubit measurements, and sequenced on  
550 an Illumina HiSeq 4000 to generate 2x150bp paired-end reads.

551

### 552 **Identification of confident human-chimpanzee SNVs**

553 To identify a confident list of human-chimpanzee SNVs that could be used to quantify allele-specific  
554 expression and chromatin accessibility, we first downloaded hg38-panTro6 MAF files from UCSC and  
555 whole-genome sequencing data generated from the parental human and chimpanzee iPS cells (in the  
556 form of bam files aligned to hg38 and panTro5, generously provided by the Gilad lab). We first  
557 converted them back to fastq files and then mapped reads to panTro6 and hg38 (we mapped both  
558 human and chimpanzee to both reference genomes) using bowtie2 with the flags `—very-sensitive-local -`  
559 `p 16` (Langmead & Salzberg, 2012). We then used a modified version of our previous approach to filter  
560 out SNVs that could not be confidently identified as homozygous in the human and chimpanzee parental  
561 lines (Agoglia et al., 2021). Briefly, we extracted SNVs and indels from both human and chimpanzee MAF  
562 files, counted reads in the WGS data that supported the human, chimpanzee, or an alternative base at  
563 that position, then filtered out any SNVs with  $< 2$  reads or  $< 90\%$  of reads supporting that species' base.  
564 We then reformatted files, merged with indels for use in HorNet, and generated a modified bed file of  
565 SNVs that includes the human and chimpanzee base at the SNV position (van de Geijn et al., 2015).

566

### 567 **Generation of allele-specific count tables**

568 An allele specific expression mapping and calling pipeline adapted from Agoglia et al. and our updated  
569 high-confidence SNV list was used. The whole pipeline was carried out twice independently using hg38  
570 or panTro6 as the reference genome. This approach was taken to eliminate genes showing strong  
571 mapping bias, defined here as genes with an absolute difference in log fold-change between the

572 panTro6 referenced and hg38 referenced runs greater than one. All sequencing reads were trimmed  
573 with SeqPrep (adapters specified by the manufacturer for the different library preparation kits) and  
574 mapped using STAR with two passes and the following parameters: --outFilterMultimapNmax 1 (Dobin  
575 et al., 2013; John St. John, n.d.). Uniquely aligned reads were deduplicated with Picard and Hornet (an  
576 implementation of WASP which first removes reads overlapping indels) was used to correct for mapping  
577 bias (Broad Institute, n.d.; van de Geijn et al., 2015). Reads were assigned to either the human allele if  
578 they contained one or more human-chimpanzee single nucleotide differences that matched the human  
579 sequence and zero positions that matched the chimpanzee sequence (and vice versa for assigning reads  
580 to the chimpanzee allele) and counted per gene as previously described (Agoglia et al., 2021).

581

582 **Detection of aneuploidy on chromosome 20 and slight chimpanzee parental contamination in PP**  
583 **hybrid2 samples**

584 In our quality control process, we plotted the log fold-change for each gene along every chromosome  
585 and inspected the results. This revealed a clear bias toward the human allele on a part of chromosome  
586 20 for hybrid2 samples, suggesting chromosome 20 aneuploidy which was also reported by Agoglia et al  
587 (Agoglia et al., 2021). As a result, we excluded chromosome 20 from all downstream analyses. In  
588 addition, we found that PP hybrid2 samples had a slight bias toward the chimpanzee allele across every  
589 chromosome which was most likely due to a small fraction of contaminating chimpanzee cells in these  
590 samples. Rather than removing these samples, we normalized the allele-specific count tables by  
591 subtracting a small number of reads from the chimpanzee allele counts calculated based on the biased  
592 ratio summarized from genome wide human and chimpanzee allele counts, to force a global log fold-  
593 change (across all autosomes except chromosome 20) of zero between the human and chimpanzee  
594 alleles. We applied this normalization to all other samples as well. To evaluate the success of this  
595 strategy, we took hybrid and chimpanzee parental iPSC RNA-seq from Agoglia et al (Agoglia et al., 2021)



596 from the same iPS cell lines as used in this study, and then simulated chimpanzee parental  
597 contamination by mixing chimpanzee parental data into hybrid 2 data to reach similar a similar degree  
598 of chimpanzee bias level to that observed in the PP hybrid2 samples. We then identified genes showing  
599 ASE (see “Identifying genes with ASE”) using the counts from the original hybrid samples, simulated  
600 contaminated samples, and corrected simulated contaminated samples respectively and compared the  
601 outputs (Supp Fig. 4).

602

### 603 **PCA and hierarchical clustering**

604 Allelic counts were normalized by DESeq2 rlog and principal components analysis (PCA) was performed  
605 on rlog normalized allelic counts with default centering and scaling (Love et al., 2014). The top 1,000  
606 variable genes with the highest variance of normalized allelic counts across all cell types were used to  
607 compute Euclidean distance matrices. The R package pheatmap was used to do hierarchical clustering  
608 and heatmap plotting.

609

### 610 **Identifying genes with ASE**

611 DESeq2 was used to measure allele-specific expression (ASE) in each cell type (Love et al., 2014). All  
612 reads from chromosome 20 were removed (as mentioned above). Two replicates per hybrid line per cell  
613 type (plus one additional replicate for SKM hybrid2 for a total of 3 samples) were used by DESeq2 with  
614 model  $\sim$ hybLine+Species to measure differential expression level. A likelihood ratio test (test="LRT",  
615 betaPrior=FALSE) was used to compute p-values. P-values were then false discovery rate adjusted using  
616 an implementation of the Benjamini-Hochberg correction in the R package qvalue (Benjamini &  
617 Hochberg, 1995; Storey Lab, n.d.). Log fold-changes were shrunk as recommended by the DESeq2  
618 pipeline (Zhu et al., 2019). Differentially expressed genes were defined as those with FDR < 0.05 when

619 aligned to hg38 and panTro6 as well as an absolute difference in log fold-change  $\leq 1$  when comparing  
620 the results from the two alignments.

621

### 622 **Identifying cell type-specifically expressed genes**

623 For the more traditional definition of cell type-specific genes, we required transcripts per million (TPM)  
624  $< 1$  for a gene in every cell type except one. In the cell type with TPM  $> 1$ , we varied how highly  
625 expressed the gene had to be in that cell type (again using a TPM cutoff, varying between one and five)  
626 to consider that gene to be specific to that cell type. A similar process to the one described in  
627 “Identifying differentially expressed genes” was used to identify cell type-specific genes based on the  
628 broader definition described in the main text. Rather than using allelic counts, total counts for each  
629 sample (i.e. all uniquely mapping deduplicated reads regardless of their allelic origin) were computed by  
630 summing all allelic and non-allelic counts. These counts were inputted to DESeq2 and the expression of  
631 each gene was compared pairwise between all cell types (Love et al., 2014). Genes were defined as cell  
632 type-specifically expressed in a cell type only if all pairwise comparisons between that cell type and  
633 other cell types resulted in an FDR  $< 0.05$  using both hg38 and panTro6 aligned counts. Due to the  
634 markedly lower number of differentially expressed genes identified in SKM, results were computed both  
635 including and excluding SKM. An analogous procedure was used to identify more broadly defined cell  
636 type-specific peaks in the down-sampled ATAC-seq dataset. Peaks were defined as specific to a cell type  
637 if the absolute log fold-change was greater than 0.5 across all pairwise comparisons with the other cell  
638 types. We also tested an absolute log fold-change threshold of 1 to ensure that our results were not  
639 sensitive to the choice of cutoff.

640

### 641 **Enrichment test for genes with cell type-specific expression patterns and genes showing ASE**

642 Odds ratios were calculated using the unconditional maximum likelihood estimate implemented in the R  
643 package epitools function `oddsratio.wald()`, and 95% confidence intervals and p-values were calculated  
644 using the normal approximation. A directly analogous procedure was performed to test for enrichment  
645 of peaks with ASCA and cell type-specific peaks.

646

#### 647 **Enrichment test stratified by expression level or evolutionary constraint**

648 Enrichment tests were carried out as in ‘Enrichment test of cell type-specific expression patterns and  
649 genes showing ASE’ except that genes were split into five equal size bins depending on which factors  
650 were used to stratify genes, and tests were done in each bin. When stratifying by expression level, genes  
651 were ordered in ascending order based on expression level (TPM) and then split into 5 equal size bins  
652 where genes in the 0-20% bin are the most lowly expressed genes and genes in the 80-100% bin are the  
653 most highly expressed genes. When stratifying by constraint metrics such as ASE variance or pHI, genes  
654 were ordered in ascending order based on ASE variance values and then split into five equal size bins  
655 where the 0-20% bin contains genes with the lowest ASE variance (i.e. most evolutionarily constrained)  
656 and the 80-100% bin contains genes with highest ASE variance (i.e. least evolutionarily constrained). To  
657 stratify the ATAC data by constraint, we used the “QCed genomic constraint by 1kb regions” computed  
658 by the gnomAD consortium (S. Chen et al., 2022). We further removed any regions that overlapped  
659 protein coding exons from the human gtf file using `bedtools subtract` (Quinlan & Hall, 2010). If a peak  
660 overlapped two or more 1 kilobase windows, it was assigned to the window with the highest constraint,  
661 mirroring the procedure used by the gnomAD consortium to assign peaks to ENCODE regulatory  
662 elements (S. Chen et al., 2022). Once the peaks were ranked by this metric, a procedure identical to that  
663 for the gene expression constraint metrics outlined above was performed.

664

#### 665 **Identification of lineage-specific selection on gene expression**

666 We used a modified version of our previously published pipeline, which uses ASE values from many  
667 individuals of a single species to estimate cis-regulatory constraint of each gene (Starr et al., 2023). We  
668 restricted these ASE values to GTEx samples from the tissue (s) of origin for each cell type (with the  
669 exceptions of RPE which was compared to all GTEx samples and MN which was compared to all brain  
670 and peripheral nerve samples as more closely matches tissues such as eyes for RPE are not available in  
671 GTEx). We then used the Mann-Whitney U test to compare the human population ASE distribution to  
672 the human-chimpanzee ASE distribution as previously described (Starr et al., 2023). We then used the  
673 previously described signed ranking by Mann-Whitney p-value that incorporates whether a gene has  
674 human or chimpanzee-biased ASE with GSEAPY and the binomial test to identify instances of lineage-  
675 specific selection (Starr et al., 2023). Due to the focus on tissue-specificity, we did not filter redundant  
676 gene sets with GSEAPY FDR < 0.25 in multiple cell types (Starr et al., 2023; Subramanian et al., 2005).

677

#### 678 **Preparation of ATAC-seq libraries**

679 We used the OmniATAC protocol with the only modification being the use of 25,000 cells instead of  
680 50,000 since the fused iPS cells are tetraploid (Corces et al., 2017). All samples for ATAC-seq prep were  
681 from the same vials used in RNA-seq library preparation except for the motor neuron libraries due to the  
682 low yield of total RNA extracted from motor neurons. After library preparation and running samples on a  
683 Bioanalyzer, we noticed a considerable number of fragments greater than 1000 bases in length. To  
684 reduce these fragments, we size selected with Ampure beads using the protocol from the Kaestner lab  
685 available here: [https://www.med.upenn.edu/kaestnerlab/assets/user-content/documents/ATAC-  
686 seq-Protocol-\(Omni\)-Kaestner-Lab.pdf](https://www.med.upenn.edu/kaestnerlab/assets/user-content/documents/ATAC-seq-Protocol-(Omni)-Kaestner-Lab.pdf).

687 After size selection and rerunning on the Bioanalyzer, we pooled the libraries together and sequenced  
688 them to compute quality control metrics. We used the R package ChrAccR to compute TSS enrichment  
689 scores (Mueller, Fabian, n.d.). We pooled all libraries with TSS enrichment score greater than 3.5. This

690 resulted in 2 CM libraries, 2 MN libraries, 2 PP libraries, 1 SKM library, and 1 HP library. After pooling,  
691 libraries were sequenced on an Illumina Hiseq 4000 to produce 2x150 paired-end reads.

692

### 693 **Mapping the ATAC-seq data**

694 We trimmed reads using SeqPrep and then mapped them to the hg38 and panTro6 reference genomes  
695 with bowtie2 in paired-end mode (John St. John, n.d.; Langmead & Salzberg, 2012). The following  
696 parameters were used: -X 2000 --very-sensitive-local -p 16. After mapping, duplicates were removed via  
697 Picard MarkDuplicates (Broad Institute, n.d.). We then removed multi-mapping reads with the command  
698 samtools view -b -q 10 (Li et al., 2009). Due to the format of bowtie2's output, running Hornet on all  
699 reads at once was excessively RAM intensive. Therefore, we split the bam files by chromosome and ran  
700 Hornet on each of the chromosomes separately. We used the files of SNVs and indels generated as  
701 described above as input to Hornet. After Hornet finished running, we used samtools merge to merge all  
702 autosomes and sex chromosomes (we excluded the mitochondrial genome) to create a final bam file for  
703 downstream analysis (Li et al., 2009).

704

### 705 **Peak calling and filtering**

706 As only one replicate was available for SKM and HP, we generated two pseudo-replicates by randomly  
707 assigning reads to one of two files using Picard SplitSamByNumberOfReads (Broad Institute, n.d.). We  
708 then called peaks on each file separately, as well as a merged file containing all the reads from a  
709 particular cell type. For example, for MN, both replicates were pooled and peaks were called on that file  
710 as well as the two replicates separately. Before peak calling, all bam files were converted to bed files.  
711 We called peaks using MACS2 callpeak with the following arguments: -f BED -p 0.01 --nomodel --shift 75  
712 --extsize 150 -B --SPMR --keep-dup all --call-summits (Y. Zhang et al., 2008, p. 2). We called peaks on  
713 both the chimpanzee-referenced and human-referenced bam files. After peak calling, we sought to filter

714 peaks using a modified version of the ENCODE pipeline designed to eliminate peaks that lack a one-to-  
715 one ortholog between humans and chimpanzees. The following pipeline was run on each cell type  
716 separately. We first filtered peaks that were not called in both replicates as well as the pooled file using  
717 code from the ENCODE pipeline based on bedtools and awk (Quinlan & Hall, 2010). We then used a  
718 custom Python script to merge overlapping peaks and used UCSC LiftOver to lift the peaks from hg38 to  
719 the panTro6 and back to hg38 as well as from panTro6 to hg38 (Kuhn et al., 2013). We then used  
720 bedtools to intersect the resulting human referenced files and filtered out any peaks that did not have at  
721 least 25% overlap with a peak in the other file (Quinlan & Hall, 2010). After filtering out peaks  
722 overlapping ENCODE blacklisted regions and merging overlapping peaks again, we lifted the file that was  
723 originally chimpanzee-referenced back to the chimpanzee genome (Amemiya et al., 2019). Finally, we  
724 removed human-referenced peaks if their chimpanzee-referenced counterpart failed to LiftOver (Kuhn  
725 et al., 2013).

726

## 727 **Annotating the peak lists**

728 To annotate the peaks, we used the list of TSS defined by Horlbeck et al. to annotate peaks (Horlbeck et  
729 al., 2016). We lifted over each TSS to hg38, expanded 1000 bases on either side of the midpoint of each  
730 TSS to generate promoters, and merged any promoters that overlapped while retaining all unique gene  
731 names associated with the promoter (Kuhn et al., 2013). We then used reciprocal LiftOver with panTro6  
732 to filter out non-orthologous promoters and used bedtools intersect to link peaks to promoters and  
733 expanded the peak to include the entirety of the promoter if necessary (Quinlan & Hall, 2010). Through  
734 this process, we also outputted a list of non-promoter CREs (sometimes labeled as enhancers as  
735 enhancers are thought to be the most common type of CRE). We took this list and used bedtools closest  
736 to link them to the two closest protein coding genes (Quinlan & Hall, 2010). Notably, the gene naming  
737 conventions differ for the Horlbeck et al. TSS list and the GTF file used for RNA-seq processing. We

738 altered all gene names in peaks to match those found in the GTF file. In some cases, the gene no longer  
739 existed in the updated hg38 GTF in which case the gene name was replaced with NAN.

740

#### 741 **Generating a unified peak list**

742 We next merged our cell type-specific peak list across all five cell types to create a unified peak list. To  
743 do this, we iteratively intersected all the peaks with bedtools and then merged any overlapping peaks  
744 (Quinlan & Hall, 2010). Finally, we added back any peaks that did not intersect a peak found in any other  
745 cell types. We then took the chimpanzee and human-referenced versions of these peak lists and ran  
746 them through the LiftOver-based non-homologous peak filtering pipeline described above to generate a  
747 final file of all identified peaks as well as which cell type (s) they were called in (Kuhn et al., 2013). Then,  
748 we reran the annotation pipeline described in ‘Annotating the peak lists’ on this new set of peaks.

749

#### 750 **Counting reads in peaks and further peak filtering**

751 First, we split the bam files into reads that we could confidently assign to the chimpanzee genome and  
752 reads we could assign to the human genome. We used our bed file of high-confidence SNVs and  
753 required at least one SNV matching the human genome as well as no SNVs matching the chimpanzee  
754 genome for a read to be assigned to human (and vice versa for chimp). We then used a custom Python  
755 script to reformat the peak list bed files as GTF files and used HTSeq to count reads in peaks using the  
756 following parameters: -s no -m union -r pos (Anders et al., 2015). We only kept peaks if they had a mean  
757 read count across replicates within a cell type of at least 25 from either allele. For example, if a peak has  
758 an average of 27 reads from the human allele and an average of 10 reads from the chimpanzee allele in  
759 MN, that peak would be kept in MN. On the other hand, if the same peak had an average of 24 reads  
760 from the human allele and an average of 10 reads from the chimpanzee allele in CM, that peak would be  
761 discarded for CM.

762

763 We next filtered the reads to remove peaks that might be differentially accessible but show evidence of  
764 mapping bias or do not agree between replicates. To do this, we removed any peaks with an absolute  
765 log fold-change greater than one in one replicate but with a fold-change of any magnitude in the  
766 opposite direction in the other. This was not done for SKM or HP as we had only one replicate. We then  
767 removed any peaks that had a log fold-change in opposite directions with an absolute difference greater  
768 than 1 in at least one replicate when comparing the human-referenced and chimpanzee-referenced  
769 counts. Finally, as described in section “Detection of aneuploidy on chromosome 20 and slight  
770 chimpanzee parental contamination in PP hybrid2 samples’ for RNA-seq data analysis, we removed any  
771 peaks on chr20 and took this as our final list of peaks for downstream analyses. Allelic counts were  
772 normalized as described in the RNA-seq data analysis. We tested for allele-specific chromatin  
773 accessibility (ASCA) using the binomial test applied to the normalized allelic counts (summed by species  
774 within a cell type). We considered any peaks with a binomial p-value less than 0.05 to be nominally  
775 differentially accessible.

776

#### 777 **Down-sampling to identify cell type-specific ATAC-seq peaks**

778 As the number of peaks detected by ATAC-seq is generally a function of read depth and our read depth  
779 varied widely across cell types, we restricted to one replicate (always hybrid1 if two replicates were  
780 available) and down-sampled reads to match the SKM sample with lowest sequencing depth. We then  
781 called peaks for cell types with a single ATAC replicate as described above.

782

#### 783 **Allelic chromatin accessibility tracks**

784 Allelic bam files with reads originating from the human allele and the chimpanzee allele (respectively)  
785 were obtained as described in ‘Counting reads in peaks and further peak filtering’. Two replicates in CM,



786 MN, and PP were pooled by cell type. Bam files were converted into bigWig files using python package  
787 deepTools bamCoverage with options: --binSize 1 --normalizeUsing CPM --effectiveGenomeSize  
788 2862010578 --ignoreForNormalization chr20 --extendReads (Ramírez et al., 2014). Tracks were  
789 visualized and plotted using the python package pyGenomeTracks (Lopez-Delisle et al., 2021). When  
790 comparing human and chimpanzee log fold-change track differences in each cell type, deepTools  
791 bigwigCompare was used to compare between human bigWig and chimpanzee bigWig with options: --  
792 pseudocount 1 --skipZeroOverZero --operation log2 -bs 1 (Ramírez et al., 2014).

793

#### 794 **ChromHMM annotation and correlation with ASE**

795 A universal chromHMM annotation was obtained for each peak based on overlap with any of the 15  
796 categories in chromHMM (excluding the blacklist category, for which peaks had already been removed)  
797 (Ernst & Kellis, 2017; Vu & Ernst, 2022). Divergence was measured as the z-score transformed median of  
798 the absolute log fold-change of human and chimpanzee normalized counts in each peak. Each peak was  
799 assigned to the closest gene and then Pearson correlation was computed between the chromatin  
800 accessibility log fold-change and the expression log fold-change for each peak and its nearest gene.  
801 Pearson correlation was computed only on categories including at least 15 peaks. When showing results  
802 for differentially accessible peaks, only peaks with binomial p-values less than 0.05 were kept and used  
803 in computing the Pearson correlation. When assigning a unique chromHMM to each peak, the  
804 chromHMM category that covered the largest portion of each peak was used. When filtering out  
805 promoter-related annotations, peaks covering any promoter-related chromHMM categories (“TSS”,  
806 “flanking promoter” and “bivalent promoter”) were filtered out and the analysis described above was  
807 repeated.

808

809 **Computation of differential expression enrichment (dEE) and differential chromatin accessibility**

810 **enrichment (dCAE)**

811 For each target cell type, taking CM as an example, the log fold-change for gene A was fixed as target log  
812 fold-change, and the log fold-changes for gene A in the remaining cell types with an opposing sign  
813 (compared to the target log fold-change) were set to zero. Then, the dEE value was calculated as the  
814 proportion of the target log fold-change in the sum of the zeroed log fold-changes across all cell types.  
815 For example, the dEE for gene A in CM would be  $\text{abs}(\text{target LFC})/\text{sum}(\text{abs}(\text{LFC after zeroing}))$ . dEE  
816 ranges from zero to one and low dEE value indicates differential expression with similar magnitude and  
817 direction across cell types, and/or the gene does not have any strong allelic bias, whereas a high dEE  
818 value indicates that this gene is only strongly differentially expressed (with the sign the log fold-change  
819 has in that cell type) in a particular cell type. dCAE uses the same procedure as dEE except the table is  
820 populated with the log fold-changes derived from chromatin accessibility measurements. dEE and dCAE  
821 are sensitive to the inclusion or exclusion of cell types (by definition), so we excluded RPE when  
822 integrative analysis combining results from dEE and dCAE was performed (to match the cell types for  
823 which dCAE could be computed, Supp Fig. 25b). After restricting to genes defined as having significant  
824 ASE or significant ASCA, we defined genes with  $\text{dEE} \geq 0.75$  in a particular cell type as showing cell type-  
825 specific ASE and peaks with  $\text{dCAE} \geq 0.75$  in one cell type as showing cell type-specific ASCA. We used  
826 bedtools intersect to intersect the peaks with our list of human-chimpanzee single nucleotide  
827 differences and the 241-way placental mammal PhyloP scores (Quinlan & Hall, 2010; Sullivan et al.,  
828 2023). We also checked whether peaks that contained human-chimpanzee differences in sites with high  
829 PhyloP scores were in the list of HARs described in Girskis et al (Girskis et al., 2021).

830

831 **Predicting regulatory activity with single-variant resolution**

832 We used sequences in fasta format as input to the deep neural network model Sei (K. M. Chen et al.,  
833 2022). Sei requires a 4096 base pair input sequence, so we put the center of our region of interest at the  
834 center of the input window and expanded equally on either side to contain 4096 base pairs. The human  
835 sequence was retrieved from hg38 and the corresponding chimpanzee sequence was retrieved from  
836 panTro6. The effect size when comparing the probabilities of each sequence having a particular  
837 chromatin state was computed as the log of the human sequence probability divided by the chimpanzee  
838 sequence probability. Only annotations for which either the chimpanzee sequence or the human  
839 sequence had a probability value greater than or equal to 0.5 were kept for downstream analysis. All  
840 SNVs between human and chimpanzee in this input window were identified and ordered based on  
841 coordinates. For each SNV position, the human sequence was changed to the chimpanzee allele at that  
842 position to generate a new sequence that was input to Sei. The log fold-change for each chromatin  
843 annotation was computed for each input sequence as described above and used as a measure of the  
844 effect of this change on the sequence. Similarly, an indel can be introduced to modify the human  
845 sequence and input to Sei. With indels, the center of the regions of interest (promoter or HAR) were  
846 always at the center of the input window and the start or end of the sequence inputted to Sei could  
847 possibly lose or gain base pairs. However, we found that for the small indels shown here this had  
848 essentially no effect on the Sei output.

849

#### 850 **Processing of publicly available datasets**

851 The data from Blake et al. and Pavlovic et al. were processed as previously described (Blake et al., 2020;  
852 Pavlovic et al., 2018; Starr et al., 2023). For the Pavlovic et al. data, log fold-changes were computed in  
853 DESeq2 with the scaled proportion of cardiomyocytes present in each sample (available in the  
854 supplemental materials of Pavlovic et al.), sex, and whether cardiomyocytes were treated with T3 as  
855 covariates (i.e. using the model  $\sim$ sex+scaled\_proportion\_cardiomyocytes+T3\_Treatment+species)

856 (Pavlovic et al., 2018). No covariates were included for Blake et al. as they had little impact on the data  
857 (Blake et al., 2020). The log fold-changes and FDR corrected p-values were directly downloaded from the  
858 supplemental materials of Kozlenkov et al. (Kozlenkov et al., 2020).

859  
860 The processed data from Ma et al. (Ma et al., 2022) were downloaded from  
861 <http://resources.sestanlab.org/PFC/>. We pseudobulked the data by cell type by summing counts within  
862 each individual. We then separately input each pairwise comparison of two species (human to  
863 chimpanzee or human to rhesus macaque) into DESeq2 with no covariates to test for differential  
864 expression and compute log fold-changes.

865  
866 The counts tables from Kanton et al.<sup>12</sup> were downloaded from  
867 <https://www.ebi.ac.uk/biostudies/arrayexpress/studies/E-MTAB-7552> and processed with SCANPY  
868 (Kanton et al., 2019, p. 29409532; Wolf et al., 2018). The data were filtered by removing cells with  
869 `n_genes_by_counts > 2500` and `>5%` mitochondrial reads. We also removed cells with fewer than 200  
870 unique genes and genes that had non-zero counts in fewer than 3 cells. After filtering, any chimpanzee  
871 cells not falling in the category (defined by Kanton et al. (Kanton et al., 2019)) "ventral forebrain  
872 progenitors and neurons" were eliminated and human cells not in the categories "ventral progenitors  
873 and neurons 1", "ventral progenitors and neurons 2", or "ventral progenitors and neurons 3" were  
874 similarly eliminated. We then merged the two counts tables, normalized/logarithmized the counts,  
875 computed PCA, used harmony to integrate cells from different species (human and chimpanzee), and  
876 found nearest neighbors with the harmonized principal components (Korsunsky et al., 2019). We then  
877 ran Leiden clustering with resolution = 0.5 to identify 7 subclusters (one of which appeared to be a  
878 technical artifact with very low counts that was removed) (Traag et al., 2019).

879

880 We identified cell types and lineages using canonical marker genes (*MKI67* and *HES5* for progenitors,  
881 *NKX2-1* and *LHX6* for the medial ganglionic eminence or MGE, *MEIS2* and *ZFHX3* for the lateral  
882 ganglionic eminence or LGE, and *SCGN* and *NR2F1* for the caudal ganglionic eminence or CGE) (Su-Feher  
883 et al., 2022). We then used the implementation of PAGA in SCANPY to compute pseudotime using the  
884 first cell in the progenitor subcluster as the root (Wolf et al., 2019). We binned cells into five equal bins  
885 along pseudotime and compared the expression of cells with non-zero counts for *GAD1* in each  
886 pseudotime bin. Within each bin, we used a Wilcoxon test to test for higher expression of *GAD1* in  
887 chimpanzee cells compared to human cells. We repeated the pseudotime analysis, binning, and  
888 comparing of *GAD1* gene expression for each subtrajectory (MGE, LGE, and CGE).

889

890 **Description of Additional file 1:** This file contains an extended evaluation of the success of the  
891 differentiations in generating the desired cell type and other cell types likely to be present in each  
892 sample.

893

894 **Description of Additional file 2:** This file contains the results of running the test for selection described  
895 by Starr et al on each cell type.

896

897 **Description of Additional file 3:** This file contains the peak-gene pairs that had concordant high dCAE  
898 and high dEE in each cell type.

899

900 **Declarations:** The authors have nothing to declare.

901

902 **Ethics approval and consent to participate:** Not relevant to our study.

903

904 **Consent for publication:** Not relevant to our study.

905

906 **Availability of data and materials:** Raw and processed data generated by this study are publicly

907 available through the Gene Expression Omnibus under accession GSE232949:

908 <https://www.ncbi.nlm.nih.gov/geo/query/acc.cgi?acc=GSE232949>. The snRNAseq data from Ma et al.

909 are available here: <http://resources.sestanlab.org/PFC/>. The scRNAseq data from Kanton et al. are

910 available here: <https://www.ebi.ac.uk/biostudies/arrayexpress/studies/E-MTAB-7552>. The bulk RNA-seq

911 data from Blake et al. and Pavlovic et al. are available here:

912 <https://www.ncbi.nlm.nih.gov/geo/query/acc.cgi?acc=GSE112356> and here:

913 <https://www.ncbi.nlm.nih.gov/geo/query/acc.cgi?acc=GSE110471> respectively. The log fold-changes

914 and associated statistics were used directly from the supplemental materials of Kozlenkov et al. The

915 human-chimp pairwise alignment used to identify SNVs and indels is available here:

916 <https://hgdownload.soe.ucsc.edu/goldenPath/hg38/vsPanTro6/>. The human and chimpanzee genomes

917 used are available here: <https://hgdownload.soe.ucsc.edu/goldenPath/hg38/bigZips/> and here:

918 <https://hgdownload.soe.ucsc.edu/goldenPath/panTro6/bigZips/> respectively. The 241-way PhyloP

919 scores were downloaded from here:

920 <https://hgdownload.soe.ucsc.edu/goldenPath/hg38/cactus241way/>. The “QCed genomic constraint by

921 1kb regions” from the gnomAD consortium are available here:

922 <https://gnomad.broadinstitute.org/downloads#v3>. All scripts for performing analyses and making

923 figures in this manuscript is publicly available at <https://github.com/banwang27/multi-celltypes>.

924

925 **Competing interests:** The authors have no competing interests to declare.

926

927 **Funding:** Funding for this work came from NIH R01HG012285. A.L.S was supported by an NDSEG  
928 fellowship.

929

930 **Author contributions:** HBF conceived of the study. ALS and BW performed all analysis, visualization,  
931 validation, and writing of software. ALS wrote the manuscript with input from BW and HBF. BW made all  
932 figures with input from ALS and HBF. All authors approved the publication of the manuscript.

933

934 **Acknowledgements:** The authors wish to acknowledge the by the Columbia Stem Cell Core for their  
935 hard work in differentiating these cells. We also acknowledge members of the Fraser lab past and  
936 present for helpful discussion. BioRender was used to generate Figures 1a, 2a, and 3a.

937

- 938 Agoglia, R. M., Sun, D., Birey, F., Yoon, S.-J., Miura, Y., Sabatini, K., Paşca, S. P., & Fraser, H.  
939 B. (2021). Primate cell fusion disentangles gene regulatory divergence in  
940 neurodevelopment. *Nature*, *592* (7854), 421–427. [https://doi.org/10.1038/s41586-021-](https://doi.org/10.1038/s41586-021-03343-3)  
941 [03343-3](https://doi.org/10.1038/s41586-021-03343-3)
- 942 Akbar, M., Calderon, F., Wen, Z., & Kim, H.-Y. (2005). Docosahexaenoic acid: A positive  
943 modulator of Akt signaling in neuronal survival. *Proceedings of the National Academy of*  
944 *Sciences*, *102* (31), 10858–10863. <https://doi.org/10.1073/pnas.0502903102>
- 945 Amemiya, H. M., Kundaje, A., & Boyle, A. P. (2019). The ENCODE Blacklist: Identification of  
946 Problematic Regions of the Genome. *Scientific Reports*, *9* (1), 9354.  
947 <https://doi.org/10.1038/s41598-019-45839-z>
- 948 Anders, S., Pyl, P. T., & Huber, W. (2015). HTSeq—A Python framework to work with high-  
949 throughput sequencing data. *Bioinformatics (Oxford, England)*, *31* (2), 166–169.  
950 <https://doi.org/10.1093/bioinformatics/btu638>
- 951 Arai, Y., Funatsu, N., Numayama-Tsuruta, K., Nomura, T., Nakamura, S., & Osumi, N. (2005).  
952 Role of Fabp7, a downstream gene of Pax6, in the maintenance of neuroepithelial cells  
953 during early embryonic development of the rat cortex. *The Journal of Neuroscience: The*  
954 *Official Journal of the Society for Neuroscience*, *25* (42), 9752–9761.  
955 <https://doi.org/10.1523/JNEUROSCI.2512-05.2005>
- 956 Ben-Ari, Y., Khalilov, I., Kahle, K. T., & Cherubini, E. (2012). The GABA Excitatory/Inhibitory  
957 Shift in Brain Maturation and Neurological Disorders. *The Neuroscientist*, *18* (5), 467–  
958 486. <https://doi.org/10.1177/1073858412438697>
- 959 Benito-Kwiecinski, S., Giandomenico, S. L., Sutcliffe, M., Riis, E. S., Freire-Pritchett, P., Kelava,  
960 I., Wunderlich, S., Martin, U., Wray, G. A., McDole, K., & Lancaster, M. A. (2021). An  
961 early cell shape transition drives evolutionary expansion of the human forebrain. *Cell*,  
962 *184* (8), 2084–2102.e19. <https://doi.org/10.1016/j.cell.2021.02.050>



- 963 Benjamini, Y., & Hochberg, Y. (1995). Controlling the False Discovery Rate: A Practical and  
964 Powerful Approach to Multiple Testing. *Journal of the Royal Statistical Society: Series B*  
965 *(Methodological)*, 57 (1), 289–300. <https://doi.org/10.1111/j.2517-6161.1995.tb02031.x>
- 966 Blake, L. E., Roux, J., Hernando-Herraez, I., Banovich, N. E., Perez, R. G., Hsiao, C. J., Eres, I.,  
967 Cuevas, C., Marques-Bonet, T., & Gilad, Y. (2020). A comparison of gene expression  
968 and DNA methylation patterns across tissues and species. *Genome Research*, 30 (2),  
969 250–262. <https://doi.org/10.1101/gr.254904.119>
- 970 Broad Institute. (n.d.). *Picard*.
- 971 Brose, N., Brunger, A., Cafiso, D., Chapman, E. R., Diao, J., Hughson, F. M., Jackson, M. B.,  
972 Jahn, R., Lindau, M., Ma, C., Rizo, J., Shin, Y.-K., Söllner, T. H., Tamm, L., Yoon, T.-Y.,  
973 & Zhang, Y. (2019). Synaptic vesicle fusion: Today and beyond. *Nature Structural &*  
974 *Molecular Biology*, 26 (8), 663–668. <https://doi.org/10.1038/s41594-019-0277-z>
- 975 Buenrostro, J. D., Giresi, P. G., Zaba, L. C., Chang, H. Y., & Greenleaf, W. J. (2013).  
976 Transposition of native chromatin for fast and sensitive epigenomic profiling of open  
977 chromatin, DNA-binding proteins and nucleosome position. *Nature Methods*, 10 (12),  
978 1213–1218. <https://doi.org/10.1038/nmeth.2688>
- 979 Burridge, P. W., Matsa, E., Shukla, P., Lin, Z. C., Churko, J. M., Ebert, A. D., Lan, F., Diecke,  
980 S., Huber, B., Mordwinkin, N. M., Plews, J. R., Abilez, O. J., Cui, B., Gold, J. D., & Wu, J.  
981 C. (2014). Chemically defined generation of human cardiomyocytes. *Nature Methods*, 11  
982 (8), 855–860. <https://doi.org/10.1038/nmeth.2999>
- 983 Calderari, S., Ria, M., Gérard, C., Nogueira, T. C., Villate, O., Collins, S. C., Neil, H., Gervasi,  
984 N., Hue, C., Suarez-Zamorano, N., Prado, C., Cnop, M., Bihoreau, M.-T., Kaisaki, P. J.,  
985 Cazier, J.-B., Julier, C., Lathrop, M., Werner, M., Eizirik, D. L., & Gauguier, D. (2018).  
986 Molecular genetics of the transcription factor GLIS3 identifies its dual function in beta  
987 cells and neurons. *Genomics*, 110 (2), 98–111.  
988 <https://doi.org/10.1016/j.ygeno.2017.09.001>

- 989 Caporali, A., & Emanuelli, C. (2009). Cardiovascular actions of neurotrophins. *Physiological*  
990 *Reviews*, *89* (1), 279–308. <https://doi.org/10.1152/physrev.00007.2008>
- 991 Castel, S. E., Aguet, F., Mohammadi, P., GTEx Consortium, Aguet, F., Anand, S., Ardlie, K. G.,  
992 Gabriel, S., Getz, G. A., Graubert, A., Hadley, K., Handsaker, R. E., Huang, K. H.,  
993 Kashin, S., Li, X., MacArthur, D. G., Meier, S. R., Nedzel, J. L., Nguyen, D. T., ...  
994 Lappalainen, T. (2020). A vast resource of allelic expression data spanning human  
995 tissues. *Genome Biology*, *21* (1), 234. <https://doi.org/10.1186/s13059-020-02122-z>
- 996 Castro-Mondragon, J. A., Riudavets-Puig, R., Rauluseviciute, I., Lemma, R. B., Turchi, L.,  
997 Blanc-Mathieu, R., Lucas, J., Boddie, P., Khan, A., Manosalva Pérez, N., Fornes, O.,  
998 Leung, T. Y., Aguirre, A., Hammal, F., Schmelter, D., Baranasic, D., Ballester, B.,  
999 Sandelin, A., Lenhard, B., ... Mathelier, A. (2022). JASPAR 2022: The 9th release of the  
1000 open-access database of transcription factor binding profiles. *Nucleic Acids Research*,  
1001 *50* (D1), D165–D173. <https://doi.org/10.1093/nar/gkab1113>
- 1002 Chal, J., Al Tanoury, Z., Hestin, M., Gobert, B., Aivio, S., Hick, A., Cherrier, T., Nesmith, A. P.,  
1003 Parker, K. K., & Pourquié, O. (2016). Generation of human muscle fibers and satellite-  
1004 like cells from human pluripotent stem cells in vitro. *Nature Protocols*, *11* (10), 1833–  
1005 1850. <https://doi.org/10.1038/nprot.2016.110>
- 1006 Chen, K. M., Wong, A. K., Troyanskaya, O. G., & Zhou, J. (2022). A sequence-based global  
1007 map of regulatory activity for deciphering human genetics. *Nature Genetics*, *54* (7), 940–  
1008 949. <https://doi.org/10.1038/s41588-022-01102-2>
- 1009 Chen, S., Francioli, L. C., Goodrich, J. K., Collins, R. L., Kanai, M., Wang, Q., Alföldi, J., Watts,  
1010 N. A., Vittal, C., Gauthier, L. D., Poterba, T., Wilson, M. W., Tarasova, Y., Phu, W.,  
1011 Yohannes, M. T., Koenig, Z., Farjoun, Y., Banks, E., Donnelly, S., ... Karczewski, K. J.  
1012 (2022). A genome-wide mutational constraint map quantified from variation in 76,156  
1013 human genomes [Preprint]. *Genetics*. <https://doi.org/10.1101/2022.03.20.485034>

- 1014 Choi, W.-S., Xu, X., Goruk, S., Wang, Y., Patel, S., Chow, M., Field, C. J., & Godbout, R.  
1015 (2021). FABP7 Facilitates Uptake of Docosahexaenoic Acid in Glioblastoma Neural  
1016 Stem-like Cells. *Nutrients*, *13* (8), 2664. <https://doi.org/10.3390/nu13082664>
- 1017 Collins, R. L., Glessner, J. T., Porcu, E., Lepamets, M., Brandon, R., Lauricella, C., Han, L.,  
1018 Morley, T., Niestroj, L.-M., Ulirsch, J., Everett, S., Howrigan, D. P., Boone, P. M., Fu, J.,  
1019 Karczewski, K. J., Kellaris, G., Lowther, C., Lucente, D., Mohajeri, K., ... Talkowski, M.  
1020 E. (2022). A cross-disorder dosage sensitivity map of the human genome. *Cell*, *185* (16),  
1021 3041-3055.e25. <https://doi.org/10.1016/j.cell.2022.06.036>
- 1022 Combs, P. A., Krupp, J. J., Khosla, N. M., Bua, D., Petrov, D. A., Levine, J. D., & Fraser, H. B.  
1023 (2018). Tissue-Specific cis-Regulatory Divergence Implicates eloF in Inhibiting  
1024 Interspecies Mating in *Drosophila*. *Current Biology*, *28* (24), 3969-3975.e3.  
1025 <https://doi.org/10.1016/j.cub.2018.10.036>
- 1026 Conway, J. R., Lex, A., & Gehlenborg, N. (2017). UpSetR: An R package for the visualization of  
1027 intersecting sets and their properties. *Bioinformatics*, *33* (18), 2938–2940.  
1028 <https://doi.org/10.1093/bioinformatics/btx364>
- 1029 Corces, M. R., Trevino, A. E., Hamilton, E. G., Greenside, P. G., Sinnott-Armstrong, N. A.,  
1030 Vesuna, S., Satpathy, A. T., Rubin, A. J., Montine, K. S., Wu, B., Kathiria, A., Cho, S.  
1031 W., Mumbach, M. R., Carter, A. C., Kasowski, M., Orloff, L. A., Risca, V. I., Kundaje, A.,  
1032 Khavari, P. A., ... Chang, H. Y. (2017). An improved ATAC-seq protocol reduces  
1033 background and enables interrogation of frozen tissues. *Nature Methods*, *14* (10), 959–  
1034 962. <https://doi.org/10.1038/nmeth.4396>
- 1035 De Rosa, A., Pellegatta, S., Rossi, M., Tunici, P., Magnoni, L., Speranza, M. C., Malusa, F.,  
1036 Miragliotta, V., Mori, E., Finocchiaro, G., & Bakker, A. (2012). A radial glia gene marker,  
1037 fatty acid binding protein 7 (FABP7), is involved in proliferation and invasion of  
1038 glioblastoma cells. *PloS One*, *7* (12), e52113.  
1039 <https://doi.org/10.1371/journal.pone.0052113>

- 1040 Dobin, A., Davis, C. A., Schlesinger, F., Drenkow, J., Zaleski, C., Jha, S., Batut, P., Chaisson,  
1041 M., & Gingeras, T. R. (2013). STAR: Ultrafast universal RNA-seq aligner. *Bioinformatics*  
1042 (*Oxford, England*), 29 (1), 15–21. <https://doi.org/10.1093/bioinformatics/bts635>
- 1043 Ebrahimi, M., Yamamoto, Y., Sharifi, K., Kida, H., Kagawa, Y., Yasumoto, Y., Islam, A.,  
1044 Miyazaki, H., Shimamoto, C., Maekawa, M., Mitsushima, D., Yoshikawa, T., & Owada,  
1045 Y. (2016). Astrocyte-expressed FABP7 regulates dendritic morphology and excitatory  
1046 synaptic function of cortical neurons. *Glia*, 64 (1), 48–62.  
1047 <https://doi.org/10.1002/glia.22902>
- 1048 Ernst, J., & Kellis, M. (2017). Chromatin-state discovery and genome annotation with  
1049 ChromHMM. *Nature Protocols*, 12 (12), 2478–2492.  
1050 <https://doi.org/10.1038/nprot.2017.124>
- 1051 Feldblum, S., Erlander, M. G., & Tobin, A. J. (1993). Different distributions of GAD65 and  
1052 GAD67 mRNAs suggest that the two glutamate decarboxylases play distinctive  
1053 functional roles. *Journal of Neuroscience Research*, 34 (6), 689–706.  
1054 <https://doi.org/10.1002/jnr.490340612>
- 1055 Field, A. R., Jacobs, F. M. J., Fiddes, I. T., Phillips, A. P. R., Reyes-Ortiz, A. M., LaMontagne,  
1056 E., Whitehead, L., Meng, V., Rosenkrantz, J. L., Olsen, M., Hauessler, M., Katzman, S.,  
1057 Salama, S. R., & Haussler, D. (2019). Structurally Conserved Primate LncRNAs Are  
1058 Transiently Expressed during Human Cortical Differentiation and Influence Cell-Type-  
1059 Specific Genes. *Stem Cell Reports*, 12 (2), 245–257.  
1060 <https://doi.org/10.1016/j.stemcr.2018.12.006>
- 1061 Fraser, H. B. (2011). Genome-wide approaches to the study of adaptive gene expression  
1062 evolution: Systematic studies of evolutionary adaptations involving gene expression will  
1063 allow many fundamental questions in evolutionary biology to be addressed. *BioEssays*,  
1064 33 (6), 469–477. <https://doi.org/10.1002/bies.201000094>

- 1065 Fraser, H. B. (2013). Gene expression drives local adaptation in humans. *Genome Research*,  
1066 23 (7), 1089–1096. <https://doi.org/10.1101/gr.152710.112>
- 1067 Fraser, H. B. (2019). Improving Estimates of Compensatory cis–trans Regulatory Divergence.  
1068 *Trends in Genetics*, 35 (1), 3–5. <https://doi.org/10.1016/j.tig.2018.09.003>
- 1069 García-Pérez, R., Esteller-Cucala, P., Mas, G., Lobón, I., Di Carlo, V., Riera, M., Kuhlwiilm, M.,  
1070 Navarro, A., Blancher, A., Di Croce, L., Gómez-Skarmeta, J. L., Juan, D., & Marquès-  
1071 Bonet, T. (2021). Epigenomic profiling of primate lymphoblastoid cell lines reveals the  
1072 evolutionary patterns of epigenetic activities in gene regulatory architectures. *Nature*  
1073 *Communications*, 12 (1), 3116. <https://doi.org/10.1038/s41467-021-23397-1>
- 1074 Girsakis, K. M., Stergachis, A. B., DeGennaro, E. M., Doan, R. N., Qian, X., Johnson, M. B.,  
1075 Wang, P. P., Sejourne, G. M., Nagy, M. A., Pollina, E. A., Sousa, A. M. M., Shin, T.,  
1076 Kenny, C. J., Scotellaro, J. L., Debo, B. M., Gonzalez, D. M., Rento, L. M., Yeh, R. C.,  
1077 Song, J. H. T., ... Walsh, C. A. (2021). Rewiring of human neurodevelopmental gene  
1078 regulatory programs by human accelerated regions. *Neuron*, 109 (20), 3239-3251.e7.  
1079 <https://doi.org/10.1016/j.neuron.2021.08.005>
- 1080 Gokhman, D., Agolia, R. M., Kinnebrew, M., Gordon, W., Sun, D., Bajpai, V. K., Naqvi, S.,  
1081 Chen, C., Chan, A., Chen, C., Petrov, D. A., Ahituv, N., Zhang, H., Mishina, Y.,  
1082 Wysocka, J., Rohatgi, R., & Fraser, H. B. (2021). Human–chimpanzee fused cells reveal  
1083 cis-regulatory divergence underlying skeletal evolution. *Nature Genetics*, 53 (4), 467–  
1084 476. <https://doi.org/10.1038/s41588-021-00804-3>
- 1085 GTEx Consortium. (2017). Genetic effects on gene expression across human tissues. *Nature*,  
1086 550 (7675), 204–213. <https://doi.org/10.1038/nature24277>
- 1087 Horlbeck, M. A., Gilbert, L. A., Villalta, J. E., Adamson, B., Pak, R. A., Chen, Y., Fields, A. P.,  
1088 Park, C. Y., Corn, J. E., Kampmann, M., & Weissman, J. S. (2016). Compact and highly  
1089 active next-generation libraries for CRISPR-mediated gene repression and activation.  
1090 *ELife*, 5, e19760. <https://doi.org/10.7554/eLife.19760>

- 1091 Hu, C. K., York, R. A., Metz, H. C., Bedford, N. L., Fraser, H. B., & Hoekstra, H. E. (2022). Cis-  
1092 Regulatory changes in locomotor genes are associated with the evolution of burrowing  
1093 behavior. *Cell Reports*, 38 (7), 110360. <https://doi.org/10.1016/j.celrep.2022.110360>
- 1094 Huang, E. J., & Reichardt, L. F. (2001). Neurotrophins: Roles in neuronal development and  
1095 function. *Annual Review of Neuroscience*, 24, 677–736.  
1096 <https://doi.org/10.1146/annurev.neuro.24.1.677>
- 1097 Hubisz, M. J., & Pollard, K. S. (2014). Exploring the genesis and functions of Human  
1098 Accelerated Regions sheds light on their role in human evolution. *Current Opinion in*  
1099 *Genetics & Development*, 29, 15–21. <https://doi.org/10.1016/j.gde.2014.07.005>
- 1100 Ichim, G., Tauszig-Delamasure, S., & Mehlen, P. (2012). Neurotrophins and cell death.  
1101 *Experimental Cell Research*, 318 (11), 1221–1228.  
1102 <https://doi.org/10.1016/j.yexcr.2012.03.006>
- 1103 Jain, A., & Tuteja, G. (2019). TissueEnrich: Tissue-specific gene enrichment analysis.  
1104 *Bioinformatics (Oxford, England)*, 35 (11), 1966–1967.  
1105 <https://doi.org/10.1093/bioinformatics/bty890>
- 1106 John St. John. (n.d.). *SeqPrep*.
- 1107 Kanton, S., Boyle, M. J., He, Z., Santel, M., Weigert, A., Sanchís-Calleja, F., Guijarro, P., Sidow,  
1108 L., Fleck, J. S., Han, D., Qian, Z., Heide, M., Huttner, W. B., Khaitovich, P., Pääbo, S.,  
1109 Treutlein, B., & Camp, J. G. (2019). Organoid single-cell genomic atlas uncovers human-  
1110 specific features of brain development. *Nature*, 574 (7778), 418–422.  
1111 <https://doi.org/10.1038/s41586-019-1654-9>
- 1112 Ke, K., Song, Y., Shen, J., Niu, M., Zhang, H., Yuan, D., Ni, H., Zhang, Y., Liu, X., Dai, A., &  
1113 Cao, M. (2015). Up-Regulation of Glis2 Involves in Neuronal Apoptosis After  
1114 Intracerebral Hemorrhage in Adult Rats. *Cellular and Molecular Neurobiology*, 35 (3),  
1115 345–354. <https://doi.org/10.1007/s10571-014-0130-1>

- 1116 Kelley, J. L., & Gilad, Y. (2020). Effective study design for comparative functional genomics.  
1117 *Nature Reviews Genetics*, 21 (7), 385–386. <https://doi.org/10.1038/s41576-020-0242-z>
- 1118 King, M.-C., & Wilson, A. C. (1975). Evolution at Two Levels in Humans and Chimpanzees:  
1119 Their macromolecules are so alike that regulatory mutations may account for their  
1120 biological differences. *Science*, 188 (4184), 107–116.  
1121 <https://doi.org/10.1126/science.1090005>
- 1122 Korsunsky, I., Millard, N., Fan, J., Slowikowski, K., Zhang, F., Wei, K., Baglaenko, Y., Brenner,  
1123 M., Loh, P., & Raychaudhuri, S. (2019). Fast, sensitive and accurate integration of  
1124 single-cell data with Harmony. *Nature Methods*, 16 (12), 1289–1296.  
1125 <https://doi.org/10.1038/s41592-019-0619-0>
- 1126 Korytnikov, R., & Nostro, M. C. (2016). Generation of polyhormonal and multipotent pancreatic  
1127 progenitor lineages from human pluripotent stem cells. *Methods*, 101, 56–64.  
1128 <https://doi.org/10.1016/j.ymeth.2015.10.017>
- 1129 Kozlenkov, A., Vermunt, M. W., Apontes, P., Li, J., Hao, K., Sherwood, C. C., Hof, P. R., Ely, J.  
1130 J., Wegner, M., Mukamel, E. A., Creighton, M. P., Koonin, E. V., & Dracheva, S. (2020).  
1131 Evolution of regulatory signatures in primate cortical neurons at cell-type resolution.  
1132 *Proceedings of the National Academy of Sciences*, 117 (45), 28422–28432.  
1133 <https://doi.org/10.1073/pnas.2011884117>
- 1134 Kuhn, R. M., Haussler, D., & Kent, W. J. (2013). The UCSC genome browser and associated  
1135 tools. *Briefings in Bioinformatics*, 14 (2), 144–161. <https://doi.org/10.1093/bib/bbs038>
- 1136 Langmead, B., & Salzberg, S. L. (2012). Fast gapped-read alignment with Bowtie 2. *Nature*  
1137 *Methods*, 9 (4), 357–359. <https://doi.org/10.1038/nmeth.1923>
- 1138 Li, H., Handsaker, B., Wysoker, A., Fennell, T., Ruan, J., Homer, N., Marth, G., Abecasis, G.,  
1139 Durbin, R., & 1000 Genome Project Data Processing Subgroup. (2009). The Sequence  
1140 Alignment/Map format and SAMtools. *Bioinformatics (Oxford, England)*, 25 (16), 2078–  
1141 2079. <https://doi.org/10.1093/bioinformatics/btp352>

- 1142 Liang, D., Elwell, A. L., Aygün, N., Krupa, O., Wolter, J. M., Kyere, F. A., Lafferty, M. J., Cheek,  
1143 K. E., Courtney, K. P., Yusupova, M., Garrett, M. E., Ashley-Koch, A., Crawford, G. E.,  
1144 Love, M. I., de la Torre-Ubieta, L., Geschwind, D. H., & Stein, J. L. (2021). Cell-type-  
1145 specific effects of genetic variation on chromatin accessibility during human neuronal  
1146 differentiation. *Nature Neuroscience*, *24* (7), 941–953. [https://doi.org/10.1038/s41593-](https://doi.org/10.1038/s41593-021-00858-w)  
1147 [021-00858-w](https://doi.org/10.1038/s41593-021-00858-w)
- 1148 Lopez-Delisle, L., Rabbani, L., Wolff, J., Bhardwaj, V., Backofen, R., Grüning, B., Ramírez, F., &  
1149 Manke, T. (2021). pyGenomeTracks: Reproducible plots for multivariate genomic  
1150 datasets. *Bioinformatics (Oxford, England)*, *37* (3), 422–423.  
1151 <https://doi.org/10.1093/bioinformatics/btaa692>
- 1152 Love, M. I., Huber, W., & Anders, S. (2014). Moderated estimation of fold change and  
1153 dispersion for RNA-seq data with DESeq2. *Genome Biology*, *15* (12), 550.  
1154 <https://doi.org/10.1186/s13059-014-0550-8>
- 1155 Ma, S., Skarica, M., Li, Q., Xu, C., Risgaard, R. D., Tebbenkamp, A. T. N., Mato-Blanco, X.,  
1156 Kovner, R., Krsnik, Ž., de Martin, X., Luria, V., Martí-Pérez, X., Liang, D., Karger, A.,  
1157 Schmidt, D. K., Gomez-Sanchez, Z., Qi, C., Gobeske, K. T., Pochareddy, S., ... Sestan,  
1158 N. (2022). Molecular and cellular evolution of the primate dorsolateral prefrontal cortex.  
1159 *Science*, eabo7257. <https://doi.org/10.1126/science.abo7257>
- 1160 Mack, K. L., & Nachman, M. W. (2017). Gene Regulation and Speciation. *Trends in Genetics*,  
1161 *33* (1), 68–80. <https://doi.org/10.1016/j.tig.2016.11.003>
- 1162 Mallanna, S. K., & Duncan, S. A. (2013). Differentiation of hepatocytes from pluripotent stem  
1163 cells. *Current Protocols in Stem Cell Biology*, *26*, 1G.4.1-1G.4.13.  
1164 <https://doi.org/10.1002/9780470151808.sc01g04s26>
- 1165 Maury, Y., Côme, J., Piskorowski, R. A., Salah-Mohellibi, N., Chevaleyre, V., Peschanski, M.,  
1166 Martinat, C., & Nedelec, S. (2015). Combinatorial analysis of developmental cues



- 1167 efficiently converts human pluripotent stem cells into multiple neuronal subtypes. *Nature*  
1168 *Biotechnology*, 33 (1), 89–96. <https://doi.org/10.1038/nbt.3049>
- 1169 Meisler, M. H., Hill, S. F., & Yu, W. (2021). Sodium channelopathies in neurodevelopmental  
1170 disorders. *Nature Reviews Neuroscience*, 22 (3), 152–166.  
1171 <https://doi.org/10.1038/s41583-020-00418-4>
- 1172 Milani, P., Escalante-Chong, R., Shelley, B. C., Patel-Murray, N. L., Xin, X., Adam, M.,  
1173 Mandefro, B., Sareen, D., Svendsen, C. N., & Fraenkel, E. (2016). Cell freezing protocol  
1174 suitable for ATAC-Seq on motor neurons derived from human induced pluripotent stem  
1175 cells. *Scientific Reports*, 6, 25474. <https://doi.org/10.1038/srep25474>
- 1176 Mizuguchi, R., Kriks, S., Cordes, R., Gossler, A., Ma, Q., & Goulding, M. (2006). Ascl1 and  
1177 Gsh1/2 control inhibitory and excitatory cell fate in spinal sensory interneurons. *Nature*  
1178 *Neuroscience*, 9 (6), 770–778. <https://doi.org/10.1038/nn1706>
- 1179 Montaigne, D., Butruille, L., & Staels, B. (2021). PPAR control of metabolism and cardiovascular  
1180 functions. *Nature Reviews Cardiology*, 18 (12), 809–823. [https://doi.org/10.1038/s41569-](https://doi.org/10.1038/s41569-021-00569-6)  
1181 [021-00569-6](https://doi.org/10.1038/s41569-021-00569-6)
- 1182 Mueller, Fabian. (n.d.). *ChrAccR*.
- 1183 Naito, Y., Lee, A. K., & Takahashi, H. (2017). Emerging roles of the neurotrophin receptor TrkC  
1184 in synapse organization. *Neuroscience Research*, 116, 10–17.  
1185 <https://doi.org/10.1016/j.neures.2016.09.009>
- 1186 Netherlands Brain Bank, Vermunt, M. W., Tan, S. C., Castelijns, B., Geeven, G., Reinink, P., de  
1187 Bruijn, E., Kondova, I., Persengiev, S., Bontrop, R., Cuppen, E., de Laat, W., &  
1188 Creighton, M. P. (2016). Epigenomic annotation of gene regulatory alterations during  
1189 evolution of the primate brain. *Nature Neuroscience*, 19 (3), 494–503.  
1190 <https://doi.org/10.1038/nn.4229>
- 1191 Pavlovic, B. J., Blake, L. E., Roux, J., Chavarria, C., & Gilad, Y. (2018). A Comparative  
1192 Assessment of Human and Chimpanzee iPSC-derived Cardiomyocytes with Primary

- 1193 Heart Tissues. *Scientific Reports*, 8 (1), 15312. [https://doi.org/10.1038/s41598-018-](https://doi.org/10.1038/s41598-018-33478-9)  
1194 33478-9
- 1195 Pollard, K. S., Salama, S. R., Lambert, N., Lambot, M.-A., Coppens, S., Pedersen, J. S.,  
1196 Katzman, S., King, B., Onodera, C., Siepel, A., Kern, A. D., Dehay, C., Igel, H., Ares, M.,  
1197 Vanderhaeghen, P., & Haussler, D. (2006). An RNA gene expressed during cortical  
1198 development evolved rapidly in humans. *Nature*, 443 (7108), 167–172.  
1199 <https://doi.org/10.1038/nature05113>
- 1200 Prud'homme, B., Gompel, N., & Carroll, S. B. (2007). Emerging principles of regulatory  
1201 evolution. *Proceedings of the National Academy of Sciences*, 104 (suppl\_1), 8605–8612.  
1202 <https://doi.org/10.1073/pnas.0700488104>
- 1203 Quinlan, A. R., & Hall, I. M. (2010). BEDTools: A flexible suite of utilities for comparing genomic  
1204 features. *Bioinformatics (Oxford, England)*, 26 (6), 841–842.  
1205 <https://doi.org/10.1093/bioinformatics/btq033>
- 1206 Ramírez, F., Dündar, F., Diehl, S., Grüning, B. A., & Manke, T. (2014). deepTools: A flexible  
1207 platform for exploring deep-sequencing data. *Nucleic Acids Research*, 42 (Web Server  
1208 issue), W187-191. <https://doi.org/10.1093/nar/gku365>
- 1209 Reilly, S. K., & Noonan, J. P. (2016). Evolution of Gene Regulation in Humans. *Annual Review*  
1210 *of Genomics and Human Genetics*, 17, 45–67. [https://doi.org/10.1146/annurev-genom-](https://doi.org/10.1146/annurev-genom-090314-045935)  
1211 090314-045935
- 1212 Romero, I. G., Ruvinsky, I., & Gilad, Y. (2012). Comparative studies of gene expression and the  
1213 evolution of gene regulation. *Nature Reviews Genetics*, 13 (7), 505–516.  
1214 <https://doi.org/10.1038/nrg3229>
- 1215 Sharma, R., Khristov, V., Rising, A., Jha, B. S., Dejene, R., Hotaling, N., Li, Y., Stoddard, J.,  
1216 Stankewicz, C., Wan, Q., Zhang, C., Campos, M. M., Miyagishima, K. J., McGaughey,  
1217 D., Villasmil, R., Mattapallil, M., Stanzel, B., Qian, H., Wong, W., ... Bharti, K. (2019).  
1218 Clinical-grade stem cell-derived retinal pigment epithelium patch rescues retinal

- 1219 degeneration in rodents and pigs. *Science Translational Medicine*, 11 (475), eaat5580.
- 1220 <https://doi.org/10.1126/scitranslmed.aat5580>
- 1221 Shave, R. E., Lieberman, D. E., Drane, A. L., Brown, M. G., Batterham, A. M., Worthington, S.,  
1222 Atencia, R., Feltrer, Y., Neary, J., Weiner, R. B., Wasfy, M. M., & Baggish, A. L. (2019).  
1223 Selection of endurance capabilities and the trade-off between pressure and volume in  
1224 the evolution of the human heart. *Proceedings of the National Academy of Sciences*,  
1225 116 (40), 19905–19910. <https://doi.org/10.1073/pnas.1906902116>
- 1226 Song, J. H. T., Grant, R. L., Behrens, V. C., Kučka, M., Roberts Kingman, G. A., Soltys, V.,  
1227 Chan, Y. F., & Kingsley, D. M. (2021). Genetic studies of human-chimpanzee divergence  
1228 using stem cell fusions. *Proceedings of the National Academy of Sciences of the United*  
1229 *States of America*, 118 (51), e2117557118. <https://doi.org/10.1073/pnas.2117557118>
- 1230 Starr, A. L., Gokhman, D., & Fraser, H. B. (2023). Accounting for cis-regulatory constraint  
1231 prioritizes genes likely to affect species-specific traits. *Genome Biology*, 24 (1), 11.  
1232 <https://doi.org/10.1186/s13059-023-02846-8>
- 1233 Storey Lab. (n.d.). *Qvalue*.
- 1234 Subramanian, A., Tamayo, P., Mootha, V. K., Mukherjee, S., Ebert, B. L., Gillette, M. A.,  
1235 Paulovich, A., Pomeroy, S. L., Golub, T. R., Lander, E. S., & Mesirov, J. P. (2005). Gene  
1236 set enrichment analysis: A knowledge-based approach for interpreting genome-wide  
1237 expression profiles. *Proceedings of the National Academy of Sciences*, 102 (43), 15545–  
1238 15550. <https://doi.org/10.1073/pnas.0506580102>
- 1239 Su-Feher, L., Rubin, A. N., Silberberg, S. N., Catta-Preta, R., Lim, K. J., Ypsilanti, A. R., Zdilar,  
1240 I., McGinnis, C. S., McKinsey, G. L., Rubino, T. E., Hawrylycz, M. J., Thompson, C.,  
1241 Gartner, Z. J., Puellas, L., Zeng, H., Rubenstein, J. L. R., & Nord, A. S. (2022). Single  
1242 cell enhancer activity distinguishes GABAergic and cholinergic lineages in embryonic  
1243 mouse basal ganglia. *Proceedings of the National Academy of Sciences*, 119 (15),  
1244 e2108760119. <https://doi.org/10.1073/pnas.2108760119>

- 1245 Sullivan, P. F., Meadows, J. R. S., Gazal, S., Phan, B. N., Li, X., Genereux, D. P., Dong, M. X.,  
1246 Bianchi, M., Andrews, G., Sakthikumar, S., Nordin, J., Roy, A., Christmas, M. J.,  
1247 Marinescu, V. D., Wallerman, O., Xue, J. R., Li, Y., Yao, S., Sun, Q., ... Lindblad-Toh, K.  
1248 (2023). *Leveraging Base Pair Mammalian Constraint to Understand Genetic Variation*  
1249 *and Human Disease* [Preprint]. Genomics. <https://doi.org/10.1101/2023.03.10.531987>
- 1250 Traag, V. A., Waltman, L., & van Eck, N. J. (2019). From Louvain to Leiden: Guaranteeing well-  
1251 connected communities. *Scientific Reports*, 9 (1), 5233. [https://doi.org/10.1038/s41598-](https://doi.org/10.1038/s41598-019-41695-z)  
1252 [019-41695-z](https://doi.org/10.1038/s41598-019-41695-z)
- 1253 Trevino, A. E., Sinnott-Armstrong, N., Andersen, J., Yoon, S.-J., Huber, N., Pritchard, J. K.,  
1254 Chang, H. Y., Greenleaf, W. J., & Paşca, S. P. (2020). Chromatin accessibility dynamics  
1255 in a model of human forebrain development. *Science (New York, N. Y.)*, 367 (6476),  
1256 eaay1645. <https://doi.org/10.1126/science.aay1645>
- 1257 Trizzino, M., Park, Y., Holsbach-Beltrame, M., Aracena, K., Mika, K., Caliskan, M., Perry, G. H.,  
1258 Lynch, V. J., & Brown, C. D. (2017). Transposable elements are the primary source of  
1259 novelty in primate gene regulation. *Genome Research*, 27 (10), 1623–1633.  
1260 <https://doi.org/10.1101/gr.218149.116>
- 1261 van de Geijn, B., McVicker, G., Gilad, Y., & Pritchard, J. K. (2015). WASP: Allele-specific  
1262 software for robust molecular quantitative trait locus discovery. *Nature Methods*, 12 (11),  
1263 1061–1063. <https://doi.org/10.1038/nmeth.3582>
- 1264 Vanderhaeghen, P., & Polleux, F. (2023). Developmental mechanisms underlying the evolution  
1265 of human cortical circuits. *Nature Reviews Neuroscience*, 24 (4), 213–232.  
1266 <https://doi.org/10.1038/s41583-023-00675-z>
- 1267 Vierstra, J., Lazar, J., Sandstrom, R., Halow, J., Lee, K., Bates, D., Diegel, M., Dunn, D., Neri,  
1268 F., Haugen, E., Rynes, E., Reynolds, A., Nelson, J., Johnson, A., Frerker, M., Buckley,  
1269 M., Kaul, R., Meuleman, W., & Stamatoyannopoulos, J. A. (2020). Global reference

- 1270 mapping of human transcription factor footprints. *Nature*, 583 (7818), 729–736.
- 1271 <https://doi.org/10.1038/s41586-020-2528-x>
- 1272 Vu, H., & Ernst, J. (2022). Universal annotation of the human genome through integration of  
1273 over a thousand epigenomic datasets. *Genome Biology*, 23 (1), 9.
- 1274 <https://doi.org/10.1186/s13059-021-02572-z>
- 1275 Wang, B., & Tontonoz, P. (2018). Liver X receptors in lipid signalling and membrane  
1276 homeostasis. *Nature Reviews Endocrinology*, 14 (8), 452–463.
- 1277 <https://doi.org/10.1038/s41574-018-0037-x>
- 1278 Watanabe, A., Toyota, T., Owada, Y., Hayashi, T., Iwayama, Y., Matsumata, M., Ishitsuka, Y.,  
1279 Nakaya, A., Maekawa, M., Ohnishi, T., Arai, R., Sakurai, K., Yamada, K., Kondo, H.,  
1280 Hashimoto, K., Osumi, N., & Yoshikawa, T. (2007). Fabp7 Maps to a Quantitative Trait  
1281 Locus for a Schizophrenia Endophenotype. *PLoS Biology*, 5 (11), e297.
- 1282 <https://doi.org/10.1371/journal.pbio.0050297>
- 1283 Wittkopp, P. J., Haerum, B. K., & Clark, A. G. (2004). Evolutionary changes in cis and trans  
1284 gene regulation. *Nature*, 430 (6995), 85–88. <https://doi.org/10.1038/nature02698>
- 1285 Wittkopp, P. J., & Kalay, G. (2012). Cis-regulatory elements: Molecular mechanisms and  
1286 evolutionary processes underlying divergence. *Nature Reviews Genetics*, 13 (1), 59–69.
- 1287 <https://doi.org/10.1038/nrg3095>
- 1288 Wolf, F. A., Angerer, P., & Theis, F. J. (2018). SCANPY: Large-scale single-cell gene  
1289 expression data analysis. *Genome Biology*, 19 (1), 15. [https://doi.org/10.1186/s13059-](https://doi.org/10.1186/s13059-017-1382-0)  
1290 [017-1382-0](https://doi.org/10.1186/s13059-017-1382-0)
- 1291 Wolf, F. A., Hamey, F. K., Plass, M., Solana, J., Dahlin, J. S., Göttgens, B., Rajewsky, N.,  
1292 Simon, L., & Theis, F. J. (2019). PAGA: Graph abstraction reconciles clustering with  
1293 trajectory inference through a topology preserving map of single cells. *Genome Biology*,  
1294 20 (1), 59. <https://doi.org/10.1186/s13059-019-1663-x>

- 1295 Yang, N., Chanda, S., Marro, S., Ng, Y.-H., Janas, J. A., Haag, D., Ang, C. E., Tang, Y., Flores,  
1296 Q., Mall, M., Wapinski, O., Li, M., Ahlenius, H., Rubenstein, J. L., Chang, H. Y., Buyla,  
1297 A. A., Südhof, T. C., & Wernig, M. (2017). Generation of pure GABAergic neurons by  
1298 transcription factor programming. *Nature Methods*, *14* (6), 621–628.  
1299 <https://doi.org/10.1038/nmeth.4291>
- 1300 Yao, Z., van Velthoven, C. T. J., Nguyen, T. N., Goldy, J., Sedeno-Cortes, A. E., Baftizadeh, F.,  
1301 Bertagnolli, D., Casper, T., Chiang, M., Crichton, K., Ding, S.-L., Fong, O., Garren, E.,  
1302 Glandon, A., Gouwens, N. W., Gray, J., Graybuck, L. T., Hawrylycz, M. J., Hirschstein,  
1303 D., ... Zeng, H. (2021). A taxonomy of transcriptomic cell types across the isocortex and  
1304 hippocampal formation. *Cell*, *184* (12), 3222-3241.e26.  
1305 <https://doi.org/10.1016/j.cell.2021.04.021>
- 1306 York, R. A., Patil, C., Abdilleh, K., Johnson, Z. V., Conte, M. A., Genner, M. J., McGrath, P. T.,  
1307 Fraser, H. B., Fernald, R. D., & Streelman, J. T. (2018). Behavior-dependent *cis*  
1308 regulation reveals genes and pathways associated with bower building in cichlid fishes.  
1309 *Proceedings of the National Academy of Sciences*, *115* (47).  
1310 <https://doi.org/10.1073/pnas.1810140115>
- 1311 Yu, X., Lin, J., Zack, D. J., & Qian, J. (2006). Computational analysis of tissue-specific  
1312 combinatorial gene regulation: Predicting interaction between transcription factors in  
1313 human tissues. *Nucleic Acids Research*, *34* (17), 4925–4936.  
1314 <https://doi.org/10.1093/nar/gkl595>
- 1315 Zhang, S., Zhang, H., Zhou, Y., Qiao, M., Zhao, S., Kozlova, A., Shi, J., Sanders, A. R., Wang,  
1316 G., Luo, K., Sengupta, S., West, S., Qian, S., Streit, M., Avramopoulos, D., Cowan, C.  
1317 A., Chen, M., Pang, Z. P., Gejman, P. V., ... Duan, J. (2020). Allele-specific open  
1318 chromatin in human iPSC neurons elucidates functional disease variants. *Science*, *369*  
1319 (6503), 561–565. <https://doi.org/10.1126/science.aay3983>

1320 Zhang, Y., Liu, T., Meyer, C. A., Eeckhoute, J., Johnson, D. S., Bernstein, B. E., Nusbaum, C.,  
1321 Myers, R. M., Brown, M., Li, W., & Liu, X. S. (2008). Model-based analysis of CHIP-Seq  
1322 (MACS). *Genome Biology*, 9 (9), R137. <https://doi.org/10.1186/gb-2008-9-9-r137>  
1323 Zhu, A., Ibrahim, J. G., & Love, M. I. (2019). Heavy-tailed prior distributions for sequence count  
1324 data: Removing the noise and preserving large differences. *Bioinformatics*, 35 (12),  
1325 2084–2092. <https://doi.org/10.1093/bioinformatics/bty895>  
1326
